1 **Sequence-structure-function relationships in class I MHC: a local**  
2 **frustration perspective**

3 **Short Title:** Biophysical basis of MHC I polymorphism

4 Onur Serçinoğlu<sup>1</sup>, Pemra Ozbek<sup>2</sup>

5 <sup>1</sup>Recep Tayyip Erdogan University, Faculty of Engineering, Department of  
6 Bioengineering, 53100, Fener, Rize, Turkey, e-mail: [onur.sercinoglu@erdogan.edu.tr](mailto:onur.sercinoglu@erdogan.edu.tr)

7 <sup>2</sup>Marmara University, Faculty of Engineering, Department of Bioengineering, 34722,  
8 Goztepe, Istanbul, Turkey, e-mail: [pemra.ozbek@marmara.edu.tr](mailto:pemra.ozbek@marmara.edu.tr)

9 \*Corresponding author: [pemra.ozbek@marmara.edu.tr](mailto:pemra.ozbek@marmara.edu.tr)

10

## 11 **Abstract**

12 Class I Major Histocompatibility Complex (MHC) binds short antigenic peptides with the  
13 help of Peptide Loading Complex (PLC), and presents them to T-cell Receptors  
14 (TCRs) of cytotoxic T-cells and Killer-cell Immunoglobulin-like Receptors (KIRs) of  
15 Natural Killer (NK) cells. With more than 10000 alleles, the Human Leukocyte Antigen  
16 (HLA) chain of MHC is the most polymorphic protein in humans. This allelic diversity  
17 provides a wide coverage of peptide sequence space, yet does not affect the three-  
18 dimensional structure of the complex. Moreover, TCRs mostly interact with pMHC in a  
19 common diagonal binding mode, and KIR-pMHC interaction is allele-dependent. With  
20 the aim of establishing a framework for understanding the relationships between  
21 polymorphism (sequence), structure (conserved fold) and function (protein interactions)  
22 of the MHC, we performed here a local frustration analysis on pMHC homology models  
23 covering 1436 HLA I alleles. An analysis of local frustration profiles indicated that (1)  
24 variations in MHC fold are unlikely due to minimally-frustrated and relatively conserved  
25 residues within the HLA peptide-binding groove, (2) high frustration patches on HLA  
26 helices are either involved in or near interaction sites of MHC with the TCR, KIR, or  
27 Tapasin of the PLC, and (3) peptide ligands mainly stabilize the F-pocket of HLA  
28 binding groove.

## 29 **Author Summary**

30 A protein complex called the Major Histocompatibility Complex (MHC) plays a critical  
31 role in our fight against pathogens via presentation of antigenic peptides to receptor  
32 molecules of our immune system cells. Our knowledge on genetics, structure and  
33 protein interactions of MHC revealed that the peptide-binding groove of Human

34 Leukocyte Chain (HLA I) of this complex is highly polymorphic and interacts with  
35 different proteins for peptide-binding and presentation over the course of its lifetime.  
36 Although the relationship between polymorphism and peptide-binding is well-known,  
37 we still lack a proper framework to understand how this polymorphism affects the  
38 overall MHC structure and protein interactions. Here, we used computational  
39 biophysics methods to generate structural models of 1436 HLA I alleles, and quantified  
40 local frustration within the HLA I, which indicates energetic optimization levels of  
41 contacts between amino acids. We identified a group of minimally frustrated and  
42 conserved positions which may be responsible for the conserved MHC structure, and  
43 detected high frustration patches on HLA surface positions taking part in interactions  
44 with other immune system proteins. Our results provide a biophysical basis for  
45 relationships between sequence, structure, and function of MHC I.

46

## 47 **Introduction**

48           The sequence-structure-function paradigm plays a central role in structural  
49 biology: the primary structure (i.e. amino acid sequence) of a protein dictates the three-  
50 dimensional structure (fold), which in turn influences the function [1–3]. The close  
51 relationship between the structural architecture and function of a protein implies that  
52 disruptions to the native folded state can destabilize the protein structure, and  
53 eventually cause loss of function. In line with this perspective, several studies  
54 integrating sequence evolution with protein biophysics reported strong correlations  
55 between positional conservation levels or rates of synonymous/non-synonymous  
56 mutation and stability-related residue metrics such as solvent accessibility or hydrogen  
57 bonding patterns [4–11]. On the other hand, stability is not the main determinant of  
58 protein function. Residues that are not involved in forming the protein scaffold, such as  
59 the catalytic sites of an enzyme or binding hot spots located on protein surface, are  
60 important for protein function as well.

61           Protein evolution is thus driven by an interplay between functional and structural  
62 constraints [2,10,12,13]. With these constraints at play, mutations may occur via two  
63 alternative mechanisms: positive and negative selection [14]. In the negative (or  
64 purifying) selection, mutations leading to detrimental effects on protein stability or  
65 function are eliminated during the selection process, leading to increased levels of  
66 conservation at sites crucial for function or stability. In the positive selection model, the  
67 protein is under constant pressure to acquire “new-functions”, thus change/variation in  
68 the amino acid sequence is favored, especially at sites with direct relevance to protein  
69 function [15].

70 From this perspective of molecular evolution and protein function, the human  
71 class I Major Histocompatibility Complex (MHC I) is an interesting system [16–19].  
72 MHC I consists of heavy (H) and light (L) chains called Human Leukocyte Antigen  
73 (HLA I) and  $\beta$ -2 microglobulin ( $\beta$ -2-m), respectively (Fig 1). Following assembly within  
74 the Endoplasmic Reticulum (ER), the MHC is unstable in the absence of a peptide  
75 ligand [20,21]. Intracellularly derived antigenic peptides originating from self or foreign  
76 proteins are loaded into the binding groove of the HLA chain of MHC with the help of a  
77 multiprotein complex called the Peptide Loading Complex (PLC). Here, the peptide  
78 contacts six different binding pockets (A,B,C,D,E and F) within the peptide binding  
79 groove of HLA [22]. Upon the formation of a stable peptide-loaded MHC (pMHC), the  
80 complex is transported to cell surface, and presents peptide ligands to immune cell  
81 receptors such as the T-Cell Receptor (TCR) of cytotoxic CD8+ T-cells, and Killer-cell  
82 Immunoglobulin-like Receptors (KIRs) of Natural Killer (NK) cells [23–26].

83 **Fig 1. The three-dimensional structure of the pMHC.**

84 With more than 10000 identified protein alleles, HLA I is the most polymorphic  
85 protein in humans [27]. The HLA I protein is clearly undergoing a process of positive  
86 selection, where the acquisition of new variants modulate the function of antigen  
87 presentation via modifying the peptide ligand recognition specificities [16,28–31]. In  
88 other words, functional constraints require HLA to maintain a very high level of allelic  
89 diversity. This allelic diversity helps the immune system cover a large space of  
90 potential peptide binders, and thereby fight against pathogens effectively [16,19,24,32].  
91 On the other hand, HLA genes are also strongly linked to infectious and autoimmune  
92 diseases due to high polymorphism levels [33].

93           Despite this high sequence variation in HLA and the enormous diversity of  
94 peptide ligands, experimentally elucidated pMHC structures of different alleles display  
95 an “ultra-conserved” fold with minimal variation [34]. Moreover, most of the TCR-pMHC  
96 crystal structures display a conventional docking mode of TCR over the HLA chain  
97 [35,36]. On the other hand, HLA allelic diversity may affect interactions of the pMHC  
98 with other proteins as well. Only certain allele groups containing specific epitopes  
99 interact with KIR [25,37]. Structural details of the PLC-pMHC interaction were also only  
100 recently revealed [34,38–41].

101           HLA polymorphism should be taken into account in order to truly comprehend  
102 the mechanisms involved in the formation of stable pMHC and interactions with TCR  
103 and KIR molecules. However, incorporating such extreme levels of polymorphism into  
104 wet-lab experiments is unfeasible. Hence, computational biophysics methods are  
105 preferred in large-scale modeling studies. In particular, homology modeling was used  
106 to classify a high number of HLA alleles into distinct groups based on peptide  
107 interaction patterns [42], binding pocket similarities [43] and surface electrostatics [44].  
108 These studies mainly focused on classifying HLA alleles based on their peptide-binding  
109 or protein interaction behaviors, and therefore only the peptide-binding groove was  
110 modeled. However, characterization of the relationship between HLA polymorphism  
111 and pMHC stability as well as TCR/KIR/PLC interactions requires the modeling of the  
112 whole complex and the use of proper methods for identifying residue-level effects on  
113 stability and protein interactions. To this end, quantification of local frustration in the  
114 structure can be utilized [45–49]. Local frustration analysis has already been applied  
115 successfully to perform similar sequence-structure-function studies on calmodulin

116 [50,51], repeat proteins [5,52], and TEM beta-lactamases [6].

117       Here, we provide an analysis of local frustration patterns of 1436 HLA I alleles.  
118 We explain how class I MHC retains a conserved fold while maintaining highly versatile  
119 ligand specificities using homology-modeled pMHC structures. Using the frustration  
120 data, we also show the existence of local frustration-based energetic footprints of  
121 polymorphism, providing a biophysical basis for the previously observed differences  
122 between molecular stabilities/cell surface expression levels of different allele groups  
123 and TCR/KIR/PLC interactions. Finally, we also provide a local frustration based  
124 explanation of how peptides stabilize peptide binding pockets.

## 125 **Results and Discussion**

### 126 **Sequence variation in HLA binding groove**

127       We began with an analysis of sequence variation in the HLA I peptide binding  
128 groove. A total of 8696 HLA I binding groove ( $\alpha$ -1 and  $\alpha$ -2 domains) sequences  
129 (including 2799, 3433 and 2464 alleles from HLA-A, -B, and -C gene loci, respectively)  
130 were included in the analysis. We identified amino acid variation at each respective  
131 position in the HLA peptide binding groove by constructing sequence logos (Fig 2A).  
132 In line with findings of a recent analysis [53], we detected high levels of variation at  
133 most binding groove positions. However, some positions were relatively conserved,  
134 and dominated by a single amino acid. This dominance is due to the imbalance  
135 between the number of occurrences of the respective amino acid and those of the  
136 others. Glycine, phenylalanine, proline, tryptophan, leucine, aspartic acid and arginine  
137 were found to be the most conserved amino acid types.

138 **Fig 2. Sequence conservation/variation and evolutionary importance of HLA I**  
139 **peptide-binding groove positions**

140 (A) Sequence logo of the HLA I peptide-binding groove (residues 1-180). Polar,  
141 neutral, basic, acidic and hydrophobic amino acids are colored green, purple, blue,  
142 red, and black, respectively. (B) real-value Evolutionary Trace (rvET) scores of binding  
143 groove positions. Low rvET scores indicate high evolutionary importance, and vice  
144 versa.

145 The sequence logos also display several “hyper-variable” positions as well  
146 (positions 9, 24, 45, 67, 97, 116, 138, 152, 156, and 163). This variation is expected,  
147 since all of these positions are located within the peptide binding pockets, and were  
148 previously shown to define allele-specific peptide ligand repertoires [42,43,54].

149 We also quantified the evolutionary importance of each position in the binding  
150 groove by computing the real-value Evolutionary Trace (rvET) ranks per position [55].  
151 rvET is an absolute rank of a given position in terms of its evolutionary importance.  
152 Here, lower rvET ranks/scores indicate higher evolutionary importance and vice versa.  
153 The ET analysis here is based on both sequence variation/conservation and the  
154 closeness of sequence divergence to the root of the constructed phylogenetic tree at  
155 a given sequence position. Thus, while conserved positions in a multiple sequence  
156 alignment tend to have low rvET scores, relatively less conserved positions may also  
157 obtain low rvET scores as well, provided that the sequence divergence occurs near  
158 the root of the tree and variation occurs within small rather than large branches of the  
159 tree [55–58]. In general, we observed higher rvET values at positions with the highest  
160 sequence variation and vice versa (Fig 2B).



## 161 **Homology modeling of HLA alleles in the context of pMHC**

162       Next, we investigated how binding groove sequence variation is reflected on the  
163 pMHC structure. As reported previously [34,43,44,59], the number of experimentally  
164 determined pMHC structures with different HLA alleles is significantly lower than the  
165 total allele number. Hence, a homology modeling approach is necessary. Moreover,  
166 homology models of the full pMHC, including the binding groove as well as distant  $\beta$ -2-  
167 m and  $\alpha$ -3 domains, are needed, since these domains make extensive contacts with  
168 each other as well as the rest of the structure, and were previously shown to be  
169 essential for peptide binding [60,61]. However, the  $\alpha$ -3 domain sequence is not  
170 available for many alleles. Moreover, it is also necessary model peptides within the  
171 binding groove as peptide ligand is an integral part of the pMHC structure. Similar to  
172 limitations in pMHC structures, the number of identified peptide ligands with binding  
173 affinity measurements for individual HLA alleles is limited as well, with some alleles  
174 having no peptide ligands identified so far [62]. Therefore, it is also necessary to  
175 predict peptide ligands using computational approaches. We thus selected 1436 HLA  
176 alleles (464, 689 and 283 from HLA-A, -B and -C loci, respectively) with complete HLA  
177 sequence (including all three domains  $\alpha$ -1,  $\alpha$ -2, and  $\alpha$ -3) for homology modeling (the  
178 complete list is given in Supplementary Table 1). The list of homology modelled alleles  
179 included 41 out of 42 core alleles representing the functionally significant sequence  
180 variation [53]. We predicted up to 10 strong binder peptides for each of the 1436  
181 alleles using netMHCpan 3.0 [63], and obtained homology models in the context of  
182 these peptides.

## 183 **Integrating biophysics into HLA I evolution**

184       After generating the homology models, we analyzed the local frustration within  
185 pMHC structures. Local frustration analysis is based on calculation of pairwise  
186 contacts between amino acids, and comparison of these contacts to possible  
187 alternative contacts made by other amino acid pairs at each site in the structure. A  
188 Single Residue Frustration Index (SRFI) is then obtained as a position-specific local  
189 frustration score: amino acids with optimized energetic contacts are minimally  
190 frustrated, where those that are the least preferred at their respective positions are  
191 highly frustrated. If neither, then the frustration is termed “neutral”. SRFI values thus  
192 indicate how ideal (minimally frustrated) the contacts of each position are or how much  
193 frustration is present (highly frustrated).

194       We used the *frustratometer2* tool [64] to quantify SRFI at each position in  
195 homology models. Since multiple peptides (and hence structures) were modeled for  
196 each allele, we calculated median SRFI per allele per position, and used these median  
197 SRFI values in further analyses.

198       In order to get an overview of local frustration against evolutionary importance of  
199 each position, we first mapped position-specific median SRFI and rvET values onto  
200 the HLA I binding groove (Fig 3). SRFI distributions of several selected positions are  
201 also given in Fig 4A. Minimal frustration was observed at conserved positions located  
202 in the  $\beta$ -sheet floor of the binding groove or in  $\alpha$ -1 and  $\alpha$ -2 domains contacting the  $\beta$ -  
203 sheet floor (5, 7, 8, 25, 27, 34, 36, 101, and 164) (Fig 4A). As expected, the top two  
204 minimally frustrated positions were cysteines responsible for forming the conserved  
205 disulfide bridge between positions 101 and 164. Mutations at these positions abolish

206 HLA expression [27,65]. Our observation of minimal frustration at conserved positions  
207 are in line with recent findings of Dib et al. [66], where co-evolving residues were  
208 shown to avoid residues important for protein stability. Haliloglu et al. previously  
209 analyzed several HLA structures using the Gaussian Network Model (GNM), and  
210 identified positions 6, 27, 101, 103, 113, 124 and 164 as “energetically active” and  
211 possibly important for stability [67]. Here, either the same positions or their sequential  
212 neighbors of were found to be minimally frustrated.

213 **Fig 3. Position-specific Single Residue Frustration Index (SRFI) and rvET scores**  
214 **mapped onto the HLA I binding groove.**

215 (A, B, C) SRFI mapped onto binding groove positions. (D, E, F) log(rvET) mapped  
216 onto binding groove positions. Selected positions are also shown on the structure.

217 **Fig 4. Box-plots of position-specific SRFI values.**

218 (A) SRFI box-plots of selected minimally and highly frustrated residues (B) SRFI box-  
219 plots of positions with neutral frustration. (C) SRFI box-plots of peptide-binding pocket  
220 positions. Coloring according to log(rvET) values.

221 On the other hand, we also observed several positions on  $\alpha$ -1 and  $\alpha$ -2 helices  
222 with relatively high frustration levels (58, 61, 68, 80, 84, 141, 144, 145, 146, 155) (Fig  
223 3). Most of these positions are located within interfaces of interaction with either TCR  
224 or Tapasin of the PLC.

225 The interaction between the TCR and pMHC I is a central event in adaptive  
226 immunity [26,68,69]. The TCR recognizes a peptide antigen only when presented by  
227 an MHC molecule (MHC restriction) [69,70]. TCR-pMHC structures determined to date

228 indicate a conserved diagonal binding geometry, where the hypervariable CDR3 loop  
229 of TCR contacts the peptide, and germline-encoded variable  $\alpha$  and  $\beta$  domains ( $V\alpha$   
230 and  $V\beta$ ) contact HLA I  $\alpha$ -1 and  $\alpha$ -2 helices, respectively [71]. Although deviations from  
231 this conventional docking mode exist, including a reversed polarity docking mode  
232 [72,73], TCR signaling in such unconventional modes is limited [74]. The importance  
233 of the conventional docking mode for TCR signaling adds support to the germline-  
234 encoded model of TCR-pMHC interaction, in which evolutionarily conserved TCR-  
235 pMHC contacts were proposed to govern MHC restriction [75]. In this regard, previous  
236 analyses of TCR-pMHC structures highlighted the importance of contacts made by  
237 HLA  $\alpha$ -1 and  $\alpha$ -2 helix residues 69 and 158 [76] or 65, 69 and 155 as a “restriction  
238 triad” [77]. We observed high SRFI levels at or near these positions.

239 Local frustration data can also provide a basis for PLC-MHC interactions.  
240 Tapasin is the main component of the PLC which contacts the HLA binding groove.  
241 Predicted Tapasin-MHC interactions [39,78] and a recently elucidated crystal structure  
242 of pMHC with TAPBPR (a Tapasin homolog) [79–81] indicated that Tapasin cradles  
243 the HLA molecule via contacts with  $\alpha$ -3 domain and  $\alpha_{2-1}$  helix segment. Our  
244 observation of high SRFI levels at positions 141, 144, 145, and 146 located on the  $\alpha_{2-1}$   
245 helix segment is in line with these findings.

246 Median SRFI values of most binding groove positions were found to indicate  
247 neutral frustration (Fig 4B). On the other hand, HLA polymorphism at peptide binding  
248 pocket positions apparently caused significant drifts towards minimal or high  
249 frustration as well, even though the median SRFI remained within the neutral  
250 frustration range (-1 to 1).

251 Overall, these results suggest that the human MHC evolves to maintain its  
252 structural fold, as evidenced by the dominance of conserved core positions showing  
253 minimal frustration within the HLA peptide binding groove. Moreover, the presence of  
254 relatively higher frustration at or near TCR and Tapasin contact positions on  $\alpha$ -1 and  
255  $\alpha$ -2 helices may also provide a biophysical basis for protein interactions of pMHC.

### 256 **Clustering of HLA alleles into distinct groups based on frustration data**

257 Next, we performed a hierarchical clustering analysis of allele-specific SRFI  
258 profiles. For simplification, we excluded positions with less than 0.5 SRFI variation  
259 from the analysis. Clustering results are shown in Fig 5A, and complete lists of alleles  
260 in each cluster are given in Supplementary Table 1. Strikingly, alleles from different  
261 gene loci were clustered into three separate groups based on frustration data of only  
262 14 positions (45, 66, 67, 69, 74, 76, 79, 80, 82, 116, 131, 152, 156, 163). An exception  
263 was the HLA-B\*46 group, which was clustered along with the HLA-C alleles. This is  
264 not surprising, as alleles in this group share the KYRV motif at 66, 67, 69, and 76 with  
265 HLA-C [82].

### 266 **Fig 5. Clustering of allele-specific SRFI profiles based on 14 binding groove** 267 **positions.**

268 (A) SRFI cluster heatmap. Clustering was performed for all 1436 alleles included, yet  
269 not all of these alleles are indicated on axis label for clarity. (B) SRFI of three identified  
270 clusters corresponding to three HLA gene loci mapped onto the binding groove.  
271 Coloring as in Figure 3.

272 Clustering of HLA alleles from distinct loci into separate groups has been

273 previously demonstrated based on peptide binding pocket similarities [43], peptide-  
274 HLA contacts [42], surface electrostatics [44] and peptide binding repertoires [83].  
275 Here, HLA-A, -B and -C alleles were clustered into distinct groups from a different  
276 perspective using local frustration data. Moreover, the structural energetics aspect  
277 provides an additional level of detail.

278 Unlike data used in previous studies, the SRFI may explain previously reported  
279 differences between HLA alleles in terms of pMHC stability and hence, the cell surface  
280 expression levels. Compared to HLA-A and HLA-B, lower cell surface expression  
281 levels were previously observed for HLA-C alleles [84–87]. Moreover, peptide  
282 repertoires of HLA-C alleles are known to be more limited [84,88]. KYRV motif was  
283 also shown to be responsible for intrinsic instability of HLA-C [86]. Relatively higher  
284 frustration in HLA-C group, especially at binding pocket positions of 66, 74 and 80, is  
285 in line with these findings: higher frustration may introduce a destabilizing effect into  
286 the binding pockets, lead to restrictions in peptide binding, and thereby reduce cell  
287 surface expression levels. Among these positions, 66 is a member of the B pocket and  
288 increased frustration in this position may indicate a less stable B pocket in HLA-C.  
289 Likewise, position 80 is a member of F pocket and a similar effect may be valid for the  
290 F pocket as well. Around position 80, positions 79 and 82 also display high frustration  
291 as well, further contributing to F pocket frustration.

292 HLA-C additionally differs from HLA-B and HLA-A in terms of interactions with  
293 KIRs of NK cells [89,90]. The alleles in this group contain either the C1 or C2 epitopes  
294 with an arginine or lysine at position 80, respectively [91]. Moreover, HLA-C (and HLA-  
295 B46, which is clustered alongside HLA-C) is distinguished by a KYRV motif at

296 positions 66, 67, 69 and 76 [88]. Previous crystal structures of HLA-C and KIR clearly  
297 show that the KIR contacts residues on  $\alpha$ -1 helix of HLA near peptide C terminus  
298 [92,93]. High levels of frustration in this contact area of HLA-C (Figure 5B) may  
299 explain why HLA-C better interacts with the KIR than HLA-A and HLA-B alleles.

300 All in all, these results support the view that HLA-C is intrinsically less stable on  
301 the cell-surface via a post-translational mechanism [84,86]. This mechanism may  
302 simply involve a less than optimal packing in the binding groove of HLA-C. Our results  
303 also may also explain the limited diversity of HLA-C peptide ligands: higher frustration  
304 in ligand binding sites may indicate a lower peptide binding capability.

### 305 **Effect of peptide binding on local frustration profiles**

306 Peptide-free (empty) MHC does not have a well-defined 3D structure (no crystal  
307 structure of a peptide-free MHC could be obtained so far). Instead, empty MHC  
308 continuously switches between alternative conformations until a sufficiently stable  
309 peptide-HLA interaction is achieved [21]. Peptide binding to HLA occurs via six  
310 pockets in the binding groove named A, B, C, D, E and F [22]. For many alleles, A, B  
311 and F pockets are decisive for peptide binding (A/B and F pockets binding N- and C-  
312 terminus of peptide ligands, respectively). Structural integrity of the F pocket of some  
313 alleles was previously shown to be more sensitive to peptide truncation in MD  
314 simulations than those of A and B pockets [41,94–96]. This implies that contacts  
315 between peptide C-terminus and HLA F pocket are highly important for molecular  
316 stability. We reasoned that, by comparing peptide-free and -loaded MHC frustration  
317 profiles, the positions that depend on peptide contacts least/most for stability can be

318 identified. Thus, we additionally quantified local frustration in peptide-free homology  
319 models, and calculated average changes in SRFI upon binding of the peptide ligands  
320 to each allele. In line with previous observations, SRFI increase (hence reduction in  
321 frustration) upon peptide binding was highest near the F-pocket (positions 81, 84, 95,  
322 142, and 147) (Fig 6).

### 323 **Fig 6. Box-plots of SRFI change upon peptide binding.**

324 Positions are ordered according to decreasing SRFI change.

## 325 **Material and Methods**

### 326 **Sequence variation analysis**

327 Aligned amino acid sequences of the  $\alpha$ -1 and  $\alpha$ -1 domains (i.e. the binding  
328 groove) of the HLA were retrieved from the IMGT/HLA database [27]. The sequences  
329 included in this file were converted to FASTA format for further analysis using  
330 Biopython [97]. Seq2Logo 2.0 web server was used to generate sequence logos to  
331 indicate conservation/variation at specific sites [98] using Shannon's Information  
332 Content (IC) [99] as follows:

$$333 \quad I = \sum_a p_a \cdot \log_2 p_a / q_a$$

334 Here,  $I$  denotes information content,  $p_a$  is the probability of observing amino acid  
335  $a$  at the respective sequence position (calculated from input multiple sequence  
336 alignment) and  $q_a$  is the pre-defined (background) probability of observing amino acid  
337 at the given position. An equal probability was used for each amino acid type (1/20).

338 The Evolutionary Trace (ET) method is an improvement over the classical IC



339 approach described above [55,56]. In this method, the IE is calculated after  
340 constructing a phylogenetic tree of sequences and for each branch (node) of the tree.  
341 Then, the conservation/variation level at a given position is calculated using the  
342 following equation:

$$343 \quad \rho_i = 1 + \sum_{n=1}^{N-1} \frac{1}{n} \sum_{g=1}^n \left\{ - \sum_a p_a \cdot \log_2 p_a / q_a \right\}$$

344 Here,  $N$  is the number of sequences in the alignment and  $N - 1$  is the number of  
345 possible nodes in the phylogenetic tree. The final score  $\rho_i$  is also termed “real-value  
346 Evolutionary Trace” score (rvET), and denotes the rank of a position ( $i$ ) with respect to  
347 all other positions. Hence, lower rvET values indicate a higher evolutionary importance  
348 and vice-versa.

### 349 **Prediction of peptide binders to class I HLA alleles and homology modeling of** 350 **pMHC structures**

351 Due to the limited number of HLA alleles with structure information at the Protein  
352 Data Bank (PDB), homology modeling was used to generate pMHC structures for  
353 1436 alleles selected as follows. For selecting peptide ligands for homology modeling,  
354 a data-driven peptide-binding prediction tool (netMHCpan 3.0) was used [63] (stand-  
355 alone version of netMHCpan 3.0 was downloaded from [http://www.cbs.dtu.dk/cgi-](http://www.cbs.dtu.dk/cgi-bin/nph-sw_request?netMHCpan)  
356 [bin/nph-sw\\_request?netMHCpan](http://www.cbs.dtu.dk/cgi-bin/nph-sw_request?netMHCpan)). First, 25000 random nonamer peptide sequences  
357 were generated using equal probability for each of the twenty naturally occurring  
358 amino acids at each peptide position. Then, binding affinities of all generated peptide  
359 sequences were predicted for each HLA allele recognized by netMHCpan 3.0 and with  
360 identified  $\alpha$ -3 domain sequence. The results were then filtered to extract up to 10

361 peptides with the highest binding affinities (i.e. lowest binding free energies) and  
362 classified as strong binders by netMHCpan 3.0 for each allele. These peptides were  
363 then homology modelled in the context of HLA alleles as well as  $\beta$ -2-m using Modeller  
364 version 9.19 [100]. An X-ray structure of the HLA-B\*53:01 allele was used as template  
365 (PDB ID: 1A1M).

### 366 **Local frustration analysis**

367 Local frustration analysis was performed on all produced homology models  
368 using *frustratometer2* tool [64] (Stand-alone version available from  
369 <https://github.com/gonzaparra/frustratometer2> was used). This tool uses the AWSEM  
370 (Associative Memory, Water Mediated, Structure and Energy Model) coarse-grained  
371 potential [101] to calculate residue-residue interaction energies. A sequence  
372 separation of 3 was used to calculate local amino acid densities, as defined by  
373 AWSEM. In addition to the interactions predicted by the AWSEM, long-range  
374 electrostatic interactions were also included - as offered by *frustratometer2* - using a  
375 Debye-Hückel potential:

$$376 \quad V_{DH} = K_{elect} \sum_{i < j} \frac{q_i q_j}{\epsilon_r} e^{-r_{ij}/l_D}$$

377 where  $q_i$  and  $q_j$  are charges of residues  $i$  and  $j$ ,  $r_{ij}$  is the distance between residues  $i$   
378 and  $j$ ,  $\epsilon_r$  is the dielectric constant of the medium (in vacuum this value is 1) and  $l_D$  is  
379 the Debye-Hückel screening length, which is calculated using physiological values of  
380 temperature (25 °C), dielectric constant of water (80) and ionic strength of water (0.1  
381 M), yielding a  $l_D$  of 10 Å. Here, it is possible to define an electronic strength of the  
382 protein system using a parameter called electrostatic constant ( $k$ ):

383

$$k = K_{elect} / \epsilon_r$$

384

Here, a  $k$  value of 4.15, which corresponds to an aqueous solution, was used.

385

Once the energies are computed using the AWSEM potential, *frustratometer2*

386

assesses the local frustration present in each residue-residue contact. Here, the

387

contacts between two residues are compared to contacts in decoy structures or

388

molten globule configurations. The tool can produce decoys by simultaneously

389

mutating both residues to all other amino acids. A normalization is applied in order to

390

compare the energies of the native structure to decoys. A “mutational frustration

391

index” ( $F_{ij}^m$ ) then captures how favorable the contacts of the residues present in the

392

native structure to decoys as follows:

393

$$F_{ij}^m = \frac{E_{ij}^{T,N} - \langle E_{ij}^{T,U} \rangle}{\sqrt{1/N \sum_{k=1}^n (E_{ij}^{T,U} - \langle e_{ij}^{T,U} \rangle)^2}}$$

394

where  $E_{ij}^{T,N}$  is the total energy of native protein and  $E_{ij}^{T,U}$  is the average energy of decoy

395

structures. By changing the amino acid identity at both positions simultaneously, not

396

only the contact between the respective two residues are changed, but those contacts

397

made by the two residues with other residues are changed as well.

398

This index can also be calculated by changing the amino acid type of *only one of*

399

*the residues* instead of applying simultaneous mutations at both positions. The index

400

then represents how favorable the contacts made by a given amino acid are at a given

401

position in the structure. When applied this way, the index is termed “Single Residue

402

Frustration Index” (SRFI).

## 403 Frustration-based clustering of HLA class I alleles

404 Upon application of local frustration analysis on pMHC structures, SRFI profiles  
405 averaged over peptides per HLA allele are obtained. This is represented in the form of  
406 an “SRFI matrix” with rows corresponding to positions (residues) in pMHC structure  
407 and columns corresponding to HLA alleles. A column-wise agglomerative clustering  
408 was applied on this matrix to identify similarities and differences between different  
409 HLA alleles in terms of their local structural energetics. Distances between clusters  
410 were defined by the “single linkage” criteria, in which inter-cluster distances were  
411 taken as the shortest distance between any two points of a pair of clusters:

$$412 \quad L(r,s) = \min (D(x_{ri},x_{sj}))$$

413 where  $L(r,s)$  is the inter-cluster distance between clusters  $r$  and  $s$  and  $D(x_{ri},x_{sj})$  is the  
414 distance between points  $x_{ri}$  and  $x_{sj}$  of the two clusters. Here, each data point  
415 represents the SRFI profile of each HLA allele. The distance between data points  
416 were computed using Manhattan distance:

$$417 \quad D(x_{ri},x_{sj}) = \sum_k^n |x_{ri,k} - x_{sj,k}|$$

418 Here, the summation is performed over rows of data ( $k \rightarrow n$ ), which are actually  
419 positions in the pMHC structure.

## 420 Acknowledgments

421 Marmara University BAP FEN-A-101018-0526 is acknowledged. The numerical  
422 calculations reported in this paper were partially performed at TUBITAK ULAKBIM, High  
423 Performance and Grid Computing Center (TRUBA resources). OS would like to

424 acknowledge access to computing resources at RTEU Samsung Center of Excellence  
425 (SMM) for data analysis.

## 426 **Author Contributions**

427 Conceived and designed the experiments: OS. Performed the experiments: OS.  
428 Analyzed the data: OS. Contributed reagents/materials/analysis tools: OS PO. Wrote  
429 the paper: OS PO

## 430 **References**

- 431 1. Liberles DA, Teichmann SA, Bahar I, Bastolla U, Bloom J, Bornberg-Bauer E, et  
432 al. The interface of protein structure, protein biophysics, and molecular evolution.  
433 Protein Science. Wiley-Blackwell; 2012. pp. 769–785. doi:10.1002/pro.2071
- 434 2. Bastolla U, Dehouck Y, Echave J. What evolution tells us about protein physics,  
435 and protein physics tells us about evolution. Current Opinion in Structural  
436 Biology. Elsevier Current Trends; 2017. pp. 59–66. doi:10.1016/j.sbi.2016.10.020
- 437 3. Bahar I, Jernigan RL, Dill KA. Protein actions: principles and modeling. 2017.  
438 Available: <https://www.crcpress.com/Protein-Actions-Principles-and-Modeling/Bahar-Jernigan-Dill/p/book/9780815341772>  
439
- 440 4. Kimura M, Ohta T. On some principles governing molecular evolution. Proc Natl  
441 Acad Sci U S A. 1974;71: 2848–52. Available:  
442 <http://www.ncbi.nlm.nih.gov/pubmed/4527913>
- 443 5. Parra RG, Espada R, Verstraete N, Ferreira DU. Structural and Energetic  
444 Characterization of the Ankyrin Repeat Protein Family. Orono CA, editor. PLoS

- 445 Comput Biol. 2015;11: e1004659. doi:10.1371/journal.pcbi.1004659
- 446 6. Abriata LA, Merijn ML, Tomatis PE. Sequence-function-stability relationships in  
447 proteins from datasets of functionally annotated variants: The case of TEM  $\beta$ -  
448 lactamases. FEBS Lett. 2012;586: 3330–3335. doi:10.1016/j.febslet.2012.07.010
- 449 7. Dean AM, Neuhauser C, Grenier E, Golding GB. The Pattern of Amino Acid  
450 Replacements in  $\alpha/\beta$ -Barrels. Mol Biol Evol. 2002;19: 1846–1864.  
451 doi:10.1093/oxfordjournals.molbev.a004009
- 452 8. Shahmoradi A, Sydykova DK, Spielman SJ, Jackson EL, Dawson ET, Meyer AG,  
453 et al. Predicting Evolutionary Site Variability from Structure in Viral Proteins:  
454 Buriedness, Packing, Flexibility, and Design. J Mol Evol. 2014;79: 130–142.  
455 doi:10.1007/s00239-014-9644-x
- 456 9. Shahmoradi A, Wilke CO. Dissecting the roles of local packing density and  
457 longer-range effects in protein sequence evolution. Proteins Struct Funct  
458 Bioinforma. 2016;84: 841–854. doi:10.1002/prot.25034
- 459 10. Echave J, Wilke CO. Biophysical Models of Protein Evolution: Understanding the  
460 Patterns of Evolutionary Sequence Divergence. Annu Rev Biophys. 2017;46: 85–  
461 103. doi:10.1146/annurev-biophys-070816-033819
- 462 11. Echave J, Jackson EL, Wilke CO. Relationship between protein thermodynamic  
463 constraints and variation of evolutionary rates among sites. Phys Biol. 2015;12:  
464 025002. doi:10.1088/1478-3975/12/2/025002
- 465 12. Wilke CO. Bringing Molecules Back into Molecular Evolution. Kosakovsky Pond  
466 SL, editor. PLoS Comput Biol. 2012;8: e1002572.

- 467           doi:10.1371/journal.pcbi.1002572
- 468   13.   Sikosek T, Chan HS. Biophysics of protein evolution and evolutionary protein  
469       biophysics. *J R Soc Interface*. 2014;11: 20140419–20140419.  
470       doi:10.1098/rsif.2014.0419
- 471   14.   Fay JC, Wyckoff GJ, Wu C-I. Positive and Negative Selection on the Human  
472       Genome. *Genetics*. 2001;158.
- 473   15.   Echave J, Spielman SJ, Wilke CO. Causes of evolutionary rate variation among  
474       protein sites. *Nature Reviews Genetics* Nature Publishing Group; Feb 19, 2016  
475       pp. 109–121. doi:10.1038/nrg.2015.18
- 476   16.   Meyer D, Vitor VR, Bitarello BD, Débora DY, Nunes K. A genomic perspective on  
477       HLA evolution. *Immunogenetics*. Springer; 2018. pp. 5–27. doi:10.1007/s00251-  
478       017-1017-3
- 479   17.   Crux NB, Elahi S. Human Leukocyte Antigen (HLA) and Immune Regulation:  
480       How Do Classical and Non-Classical HLA Alleles Modulate Immune Response to  
481       Human Immunodeficiency Virus and Hepatitis C Virus Infections? *Front Immunol*.  
482       2017;8: 832. doi:10.3389/fimmu.2017.00832
- 483   18.   Vandiedonck C, Knight JC. The human Major Histocompatibility Complex as a  
484       paradigm in genomics research. *Brief Funct Genomic Proteomic*. 2009;8: 379–  
485       94. doi:10.1093/bfgp/elp010
- 486   19.   Martínez-Borra J, López-Larrea C. The emergence of the Major  
487       Histocompatibility Complex. *Adv Exp Med Biol*. 2012;738: 277–89.  
488       doi:10.1007/978-1-4614-1680-7\_16

- 489 20. Kurimoto E, Kuroki K, Yamaguchi Y, Yagi-Utsumi M, Igaki T, Iguchi T, et al.  
490 Structural and functional mosaic nature of MHC class I molecules in their  
491 peptide-free form. *Mol Immunol.* 2013;55: 393–399.  
492 doi:10.1016/j.molimm.2013.03.014
- 493 21. Theodossis A. On the trail of empty MHC class-I. *Mol Immunol.* 2013;55: 131–4.  
494 doi:10.1016/j.molimm.2012.10.012
- 495 22. Saper MA, Bjorkman PJ, Wiley DC. Refined structure of the human  
496 histocompatibility antigen HLA-A2 at 2.6 Å resolution. *J Mol Biol.* 1991;219: 277–  
497 319. doi:10.1016/0022-2836(91)90567-P
- 498 23. Liu J, Gao GF. Major Histocompatibility Complex: Interaction with Peptides. eLS.  
499 Chichester, UK: John Wiley & Sons, Ltd; 2011.  
500 doi:10.1002/9780470015902.a0000922.pub2
- 501 24. Charles A Janeway J, Travers P, Walport M, Shlomchik MJ. The major  
502 histocompatibility complex and its functions. Garland Science; 2001. Available:  
503 <http://www.ncbi.nlm.nih.gov/books/NBK27156/>
- 504 25. Rangarajan S, Mariuzza RA. Natural Killer Cell Receptors. *Struct Biol Immunol.*  
505 2018; 101–125. doi:10.1016/B978-0-12-803369-2.00004-8
- 506 26. Rossjohn J, Gras S, Miles JJ, Turner SJ, Godfrey DI, McCluskey J. T Cell  
507 Antigen Receptor Recognition of Antigen-Presenting Molecules. *Annu Rev*  
508 *Immunol.* 2015;33: 169–200. doi:10.1146/annurev-immunol-032414-112334
- 509 27. Robinson J, Halliwell JA, Hayhurst JD, Flicek P, Parham P, Marsh SGE. The IPD  
510 and IMGT/HLA database: Allele variant databases. *Nucleic Acids Res.* 2015;43:



- 511 D423–D431. doi:10.1093/nar/gku1161
- 512 28. Spurgin LG, Richardson DS. How pathogens drive genetic diversity: MHC,  
513 mechanisms and misunderstandings. *Proc R Soc B Biol Sci.* 2010;277: 979–988.  
514 doi:10.1098/rspb.2009.2084
- 515 29. Sommer S. The importance of immune gene variability (MHC) in evolutionary  
516 ecology and conservation. *Frontiers in Zoology.* BioMed Central; 2005. p. 16.  
517 doi:10.1186/1742-9994-2-16
- 518 30. Parham P. Function and polymorphism of human leukocyte antigen-A,B,C  
519 molecules. *Am J Med.* 1988;85: 2–5. doi:10.1016/0002-9343(88)90369-5
- 520 31. Hughes AL, Nei M. Pattern of nucleotide substitution at major histocompatibility  
521 complex class I loci reveals overdominant selection. *Nature.* 1988;335: 167–170.  
522 doi:10.1038/335167a0
- 523 32. Sette A, Sidney J. Nine major HLA class I supertypes account for the vast  
524 preponderance of HLA-A and -B polymorphism. *Immunogenetics.* 1999;50: 201–  
525 212. doi:10.1007/s002510050594
- 526 33. Dendrou CA, Petersen J, Rossjohn J, Fugger L. HLA variation and disease.  
527 *Nature Reviews Immunology.* Nature Publishing Group; 2018. pp. 325–339.  
528 doi:10.1038/nri.2017.143
- 529 34. Wieczorek M, Abualrous ET, Sticht J, Álvaro-Benito M, Stolzenberg S, Noé F, et  
530 al. Major histocompatibility complex (MHC) class I and MHC class II proteins:  
531 Conformational plasticity in antigen presentation. *Frontiers in Immunology.* 2017.  
532 p. 292. doi:10.3389/fimmu.2017.00292

- 533 35. Rossjohn J, Gras S, Miles JJ, Turner SJ, Godfrey DI, McCluskey J. T Cell  
534 Antigen Receptor Recognition of Antigen-Presenting Molecules. *Annu Rev*  
535 *Immunol.* 2015;33: 169–200. doi:10.1146/annurev-immunol-032414-112334
- 536 36. Antunes DA, Rigo MM, Freitas M V., Mendes MFA, Sinigaglia M, Lizée G, et al.  
537 Interpreting T-Cell Cross-reactivity through Structure: Implications for TCR-  
538 Based Cancer Immunotherapy. *Front Immunol.* 2017;8: 1–16.  
539 doi:10.3389/fimmu.2017.01210
- 540 37. Li Y, Mariuzza RA. Structural basis for recognition of cellular and viral ligands by  
541 NK cell receptors. *Front Immunol.* 2014;5: 123. doi:10.3389/fimmu.2014.00123
- 542 38. Blees A, Januliene D, Hofmann T, Koller N, Schmidt C, Trowitzsch S, et al.  
543 Structure of the human MHC-I peptide-loading complex. *Nature.* 2017;551: 525–  
544 528. doi:10.1038/nature24627
- 545 39. Fisette O, Wingbermhühle S, Tampé R, Schäfer L V. Molecular mechanism of  
546 peptide editing in the tapasin-MHC I complex. *Sci Rep.* 2016;6: 19085.  
547 doi:10.1038/srep19085
- 548 40. Hafstrand I, Sayitoglu EC, Apavaloaei A, Josey BJ, Sun R, Han X, et al.  
549 Successive crystal structure snapshots suggest the basis for MHC class I  
550 peptide loading and editing by tapasin. *Proc Natl Acad Sci U S A.* 2019;116:  
551 5055–5060. doi:10.1073/pnas.1807656116
- 552 41. Fisette O, Wingbermhühle S, Schäfer L V. Partial Dissociation of Truncated  
553 Peptides Influences the Structural Dynamics of the MHCI Binding Groove. *Front*  
554 *Immunol.* 2017;8: 408. doi:10.3389/fimmu.2017.00408

- 555 42. Harjanto S, Ng LFP, Tong JC. Clustering HLA class I superfamilies using  
556 structural interaction patterns. Kobe B, editor. PLoS One. 2014;9: e86655.  
557 doi:10.1371/journal.pone.0086655
- 558 43. Mukherjee S, Warwicker J, Chandra N. Deciphering complex patterns of class-I  
559 HLA-peptide cross-reactivity via hierarchical grouping. Immunol Cell Biol.  
560 2015;93: 522–32. doi:10.1038/icb.2015.3
- 561 44. Mumtaz S, Nabney IT, Flower DR. Scrutinizing human MHC polymorphism:  
562 Supertype analysis using Poisson-Boltzmann electrostatics and clustering. J Mol  
563 Graph Model. 2017;77: 130–136. doi:10.1016/J.JMGM.2017.07.033
- 564 45. Onuchic JN, Luthey-Schulten Z, Wolynes PG. THEORY OF PROTEIN  
565 FOLDING: The Energy Landscape Perspective. Annu Rev Phys Chem. 1997;48:  
566 545–600. doi:10.1146/annurev.physchem.48.1.545
- 567 46. Ferreiro DU, Komives EA, Wolynes PG. Frustration in biomolecules. Q Rev  
568 Biophys. 2014;47: 285–363. doi:10.1017/S0033583514000092
- 569 47. Ferreiro DU, Komives EA, Wolynes PG. Frustration, function and folding. Curr  
570 Opin Struct Biol. 2018;48: 68–73. doi:10.1016/J.SBI.2017.09.006
- 571 48. Ferreiro DU, Hegler JA, Komives EA, Wolynes PG. Localizing frustration in  
572 native proteins and protein assemblies. Proc Natl Acad Sci U S A. 2007;104:  
573 19819–24. doi:10.1073/pnas.0709915104
- 574 49. Freiburger MI, Guzovsky AB, Wolynes PG, Parra RG, Ferreiro DU. Local  
575 frustration around enzyme active sites. Proc Natl Acad Sci U S A. 2019;116:  
576 4037–4043. doi:10.1073/pnas.1819859116

- 577 50. Tripathi S, Waxham MN, Cheung MS, Liu Y. Lessons in Protein Design from  
578 Combined Evolution and Conformational Dynamics. *Sci Rep.* 2015;5: 14259.  
579 doi:10.1038/srep14259
- 580 51. Tripathi S, Wang Q, Zhang P, Hoffman L, Waxham MN, Cheung MS.  
581 Conformational frustration in calmodulin-target recognition. *J Mol Recognit.*  
582 2015;28: 74–86. doi:10.1002/jmr.2413
- 583 52. Espada R, Ferreiro DU, Parra R G. The Design of Repeat Proteins: Stability  
584 Conflicts with Functionality. *Biochem Mol Biol J.* 2017;03. doi:10.21767/2471-  
585 8084.100031
- 586 53. Robinson J, Guethlein LA, Cereb N, Yang SY, Norman PJ, Marsh SGE, et al.  
587 Distinguishing functional polymorphism from random variation in the sequences  
588 of >10,000 HLA-A, -B and -C alleles. Keating BJ, editor. *PLoS Genet.* 2017;13:  
589 e1006862. doi:10.1371/journal.pgen.1006862
- 590 54. van Deutekom HWM, Keşmir C. Zooming into the binding groove of HLA  
591 molecules: which positions and which substitutions change peptide binding  
592 most? *Immunogenetics.* 2015;67: 425–36. doi:10.1007/s00251-015-0849-y
- 593 55. Mihalek I, Reš I, Lichtarge O. A Family of Evolution-Entropy Hybrid Methods for  
594 Ranking Protein Residues by Importance. *J Mol Biol.* 2004;336: 1265–1282.  
595 doi:10.1016/j.jmb.2003.12.078
- 596 56. Wilkins A, Erdin S, Lua R, Lichtarge O. Evolutionary trace for prediction and  
597 redesign of protein functional sites. *Methods Mol Biol.* 2012;819: 29–42.  
598 doi:10.1007/978-1-61779-465-0\_3

- 599 57. Wilkins AD, Lua R, Erdin S, Ward RM, Lichtarge O. Sequence and structure  
600 continuity of evolutionary importance improves protein functional site discovery  
601 and annotation. *Protein Sci.* 2010;19: 1296–1311. doi:10.1002/pro.406
- 602 58. Madabushi S, Yao H, Marsh M, Kristensen DM, Philippi A, Sowa ME, et al.  
603 Structural clusters of evolutionary trace residues are statistically significant and  
604 common in proteins. *J Mol Biol.* 2002;316: 139–154. doi:10.1006/jmbi.2001.5327
- 605 59. Mukherjee S, Warshel A. Electrostatic origin of the mechanochemical rotary  
606 mechanism and the catalytic dwell of F1-ATPase. *Proc Natl Acad Sci U S A.*  
607 2011;108: 20550–5. doi:10.1073/pnas.1117024108
- 608 60. Omasits U, Knapp B, Neumann M, Steinhauser O, Kobler R, Schreiner W, et al.  
609 Analysis of key parameters for molecular dynamics of pMHC molecules. *Mol*  
610 *Simul.* 2008;34: 781–793. doi:10.1080/08927020802256298
- 611 61. Serçinoğlu O, Ozbek P. Computational characterization of residue couplings and  
612 micropolymorphism-induced changes in the dynamics of two differentially  
613 disease-associated human MHC class-I alleles. *J Biomol Struct Dyn.* 2018;36:  
614 724–740. doi:10.1080/07391102.2017.1295884
- 615 62. Vita R, Overton JA, Greenbaum JA, Ponomarenko J, Clark JD, Cantrell JR, et al.  
616 The immune epitope database (IEDB) 3.0. *Nucleic Acids Res.* 2014;43: D405–  
617 D412. doi:10.1093/nar/gku938
- 618 63. Nielsen M, Andreatta M. NetMHCpan-3.0; improved prediction of binding to MHC  
619 class I molecules integrating information from multiple receptor and peptide  
620 length datasets. *Genome Med.* 2016;8: 33. doi:10.1186/s13073-016-0288-x

- 621 64. Parra RG, Schafer NP, Radusky LG, Tsai MY, Guzovsky AB, Wolynes PG, et al.  
622 Protein Frustratometer 2: a tool to localize energetic frustration in protein  
623 molecules, now with electrostatics. *Nucleic Acids Res.* 2016;44: W356–W360.  
624 doi:10.1093/nar/gkw304
- 625 65. Warburton RJ, Matsui M, Rowland-Jones SL, Gammon MC, Katzenstein GE,  
626 Wei T, et al. Mutation of the  $\alpha 2$  domain disulfide bridge of the class I molecule  
627 HLA-A\*0201 Effect on maturation and peptide presentation. *Hum Immunol.*  
628 1994;39: 261–271. doi:10.1016/0198-8859(94)90269-0
- 629 66. Dib L, Salamin N, Gfeller D. Polymorphic sites preferentially avoid co-evolving  
630 residues in MHC class I proteins. *PLoS Comput Biol.* 2018;14: e1006188.  
631 doi:10.1371/journal.pcbi.1006188
- 632 67. Haliloglu T, Gul A, Erman B. Predicting important residues and interaction  
633 pathways in proteins using gaussian network model: Binding and stability of HLA  
634 proteins. Nussinov R, editor. *PLoS Comput Biol.* 2010;6: 20.  
635 doi:10.1371/journal.pcbi.1000845
- 636 68. Courtney AH, Lo WL, Weiss A. TCR Signaling: Mechanisms of Initiation and  
637 Propagation. *Trends in Biochemical Sciences.* 1 Feb 2017: 108–123.  
638 doi:10.1016/j.tibs.2017.11.008
- 639 69. La Gruta NL, Gras S, Daley SR, Thomas PG, Rossjohn J. Understanding the  
640 drivers of MHC restriction of T cell receptors. *Nature Reviews Immunology.* 10  
641 Apr 2018: 1–12. doi:10.1038/s41577-018-0007-5
- 642 70. Zinkernagel RM, Doherty PC. Immunological surveillance against altered self

- 643 components by sensitised T lymphocytes in lymphocytes choriomeningitis.  
644 Nature. 1974;251: 547–548. doi:10.1038/251547a0
- 645 71. Rossjohn J, Gras S, Miles JJ, Turner SJ, Godfrey DI, McCluskey J. T Cell  
646 Antigen Receptor Recognition of Antigen-Presenting Molecules. Annu Rev  
647 Immunol. 2015;33: 169–200. doi:10.1146/annurev-immunol-032414-112334
- 648 72. Beringer DX, Kleijwegt FS, Wiede F, van der Slik AR, Loh KL, Petersen J, et al.  
649 T cell receptor reversed polarity recognition of a self-antigen major  
650 histocompatibility complex. Nat Immunol. 2015;16: 1153–1161.  
651 doi:10.1038/ni.3271
- 652 73. Gras S, Chadderton J, Del Campo CM, Farenc C, Wiede F, Josephs TM, et al.  
653 Reversed T Cell Receptor Docking on a Major Histocompatibility Class I  
654 Complex Limits Involvement in the Immune Response. Immunity. 2016;45: 749–  
655 760. doi:10.1016/j.immuni.2016.09.007
- 656 74. Adams JJ, Narayanan S, Liu B, Birnbaum ME, Kruse AC, Bowerman NA, et al. T  
657 Cell Receptor Signaling Is Limited by Docking Geometry to Peptide-Major  
658 Histocompatibility Complex. Immunity. 2011;35: 681–693.  
659 doi:10.1016/J.IMMUNI.2011.09.013
- 660 75. Garcia KC, Adams JJ, Feng D, Ely LK. The molecular basis of TCR germline  
661 bias for MHC is surprisingly simple. Nat Immunol. 2009;10: 143–147.  
662 doi:10.1038/ni.f.219
- 663 76. Marrack P, Scott-Browne JP, Dai S, Gapin L, Kappler JW. Evolutionarily  
664 Conserved Amino Acids That Control TCR-MHC Interaction. Annu Rev Immunol.

- 665 2008;26: 171–203. doi:10.1146/annurev.immunol.26.021607.090421
- 666 77. Tynan FE, Burrows SR, Buckle AM, Clements CS, Borg NA, Miles JJ, et al. T cell  
667 receptor recognition of a “super-bulged” major histocompatibility complex class I-  
668 bound peptide. *Nat Immunol.* 2005;6: 1114–1122. doi:10.1038/ni1257
- 669 78. Fleischmann G, Fiset O, Thomas C, Wieneke R, Tumulka F, Schneeweiss C,  
670 et al. Mechanistic Basis for Epitope Proofreading in the Peptide-Loading  
671 Complex. *J Immunol.* 2015;195: 4503–13. doi:10.4049/jimmunol.1501515
- 672 79. Thomas C, Tampé R. Structure of the TAPBPR–MHC I complex defines the  
673 mechanism of peptide loading and editing. *Science (80- )*. 2017;358: 1060–1064.  
674 doi:10.1126/science.aao6001
- 675 80. Jiang J, Natarajan K, Boyd LF, Morozov GI, Mage MG, Margulies DH. Crystal  
676 structure of a TAPBPR–MHC I complex reveals the mechanism of peptide  
677 editing in antigen presentation. *Science (80- )*. 2017;358: 1064–1068.  
678 doi:10.1126/science.aao5154
- 679 81. Natarajan K, Jiang J, Margulies DH. Structural aspects of chaperone-mediated  
680 peptide loading in the MHC-I antigen presentation pathway. *Crit Rev Biochem*  
681 *Mol Biol.* 2019;54: 164–173. doi:10.1080/10409238.2019.1610352
- 682 82. Hilton HG, McMurtrey CP, Han AS, Djaoud Z, Guethlein LA, Blokhuis JH, et al.  
683 The Intergenic Recombinant HLA-B\*46:01 Has a Distinctive Peptidome that  
684 Includes KIR2DL3 Ligands. *Cell Rep.* 2017;19: 1394–1405.  
685 doi:10.1016/j.celrep.2017.04.059
- 686 83. Sidney J, Peters B, Frahm N, Brander C, Sette A. HLA class I supertypes: a



- 687 revised and updated classification. BMC Immunol. 2008;9: 1. doi:10.1186/1471-  
688 2172-9-1
- 689 84. Neisig A, Melief CJ, Neefjes J. Reduced cell surface expression of HLA-C  
690 molecules correlates with restricted peptide binding and stable TAP interaction. J  
691 Immunol. 1998;160: 171–9. Available:  
692 <http://www.ncbi.nlm.nih.gov/pubmed/9551969>
- 693 85. Neefjes JJ, Ploegh HL. Allele and locus-specific differences in cell surface  
694 expression and the association of HLA class I heavy chain with  $\beta$ 2-microglobulin:  
695 differential effects of inhibition of glycosylation on class I subunit association. Eur  
696 J Immunol. 1988;18: 801–810. doi:10.1002/eji.1830180522
- 697 86. Sibilio L, Martayan A, Setini A, Monaco E Lo, Tremante E, Butler RH, et al. A  
698 single bottleneck in HLA-C assembly. J Biol Chem. 2008;283: 1267–1274.  
699 doi:10.1074/jbc.M708068200
- 700 87. Apps R, Meng Z, Del Prete GQ, Lifson JD, Zhou M, Carrington M. Relative  
701 Expression Levels of the HLA Class-I Proteins in Normal and HIV-Infected Cells.  
702 J Immunol. 2015;194: 3594–3600. doi:10.4049/jimmunol.1403234
- 703 88. Zemmour J, Parham P. Distinctive polymorphism at the HLA-C locus:  
704 implications for the expression of HLA-C. J Exp Med. 1992;176: 937–950.  
705 doi:10.1084/jem.176.4.937
- 706 89. Parham P, Moffett A. Variable NK cell receptors and their MHC class I ligands in  
707 immunity, reproduction and human evolution. Nature Reviews Immunology.  
708 Nature Publishing Group; 2013. pp. 133–144. doi:10.1038/nri3370

- 709 90. Winter CC, Long E. A single amino acid in the p58 killer cell inhibitory receptor  
710 controls the ability of natural killer cells to discriminate between the two groups of  
711 HLA-C allotypes. *J Immunol.* 1997;142: 142–144.  
712 doi:10.4049/jimmunol.166.12.7260
- 713 91. Winter CC, Long EO. A Single Amino Acid in the p58 Killer Cell Inhibitory  
714 Receptor Controls the Ability of Natural Killer Cells to Discriminate between the  
715 Two Groups of HLA-C Allotypes. *J Immunol.* 1997;158: 4026–4028. Available:  
716 <http://www.ncbi.nlm.nih.gov/pubmed/9126959>
- 717 92. Boyington JC, Sun PD. A structural perspective on MHC class I recognition by  
718 killer cell immunoglobulin-like receptors. *Molecular Immunology.* Pergamon;  
719 2002. pp. 1007–1021. doi:10.1016/S0161-5890(02)00030-5
- 720 93. Fan QR, Long EO, Wiley DC. Crystal structure of the human natural killer cell  
721 inhibitory receptor KIR2DL1–HLA-Cw4 complex. *Nat Immunol.* 2001;2: 452–460.  
722 doi:10.1038/87766
- 723 94. Abualrous ET, Saini SK, Ramnarayan VR, Ilca FT, Zacharias M, Springer S. The  
724 Carboxy Terminus of the Ligand Peptide Determines the Stability of the MHC  
725 Class I Molecule H-2Kb: A Combined Molecular Dynamics and Experimental  
726 Study. *PLoS One.* 2015;10: e0135421. doi:10.1371/journal.pone.0135421
- 727 95. Abualrous ET, Fritzsche S, Hein Z, Al-Balushi MS, Reinink P, Boyle LH, et al. F  
728 pocket flexibility influences the tapasin dependence of two differentially disease-  
729 associated MHC Class I proteins. *Eur J Immunol.* 2015;45: 1248–57.  
730 doi:10.1002/eji.201445307

- 731 96. Hein Z, Uchtenhagen H, Abualrous ET, Saini SK, Janßen L, Van Hateren A, et  
732 al. Peptide-independent stabilization of MHC class I molecules breaches cellular  
733 quality control. *J Cell Sci.* 2014;127: 2885–97. doi:10.1242/jcs.145334
- 734 97. Cock PJA, Antao T, Chang JT, Chapman BA, Cox CJ, Dalke A, et al. Biopython:  
735 freely available Python tools for computational molecular biology and  
736 bioinformatics. *Bioinformatics.* 2009;25: 1422–3.  
737 doi:10.1093/bioinformatics/btp163
- 738 98. Thomsen MCF, Nielsen M. Seq2Logo: A method for construction and  
739 visualization of amino acid binding motifs and sequence profiles including  
740 sequence weighting, pseudo counts and two-sided representation of amino acid  
741 enrichment and depletion. *Nucleic Acids Res.* 2012;40: W281–W287.  
742 doi:10.1093/nar/gks469
- 743 99. Shannon CE. A Mathematical Theory of Communication. *Bell Syst Tech J.*  
744 1948;27: 379–423. doi:10.1002/j.1538-7305.1948.tb01338.x
- 745 100. Webb B, Sali A. Comparative Protein Structure Modeling Using MODELLER.  
746 *Curr Protoc Bioinformatics.* 2014;47: 5.6.1-5.6.32.  
747 doi:10.1002/0471250953.bi0506s47
- 748 101. Davtyan A, Schafer NP, Zheng W, Clementi C, Wolynes PG, Papoian GA.  
749 AWSEM-MD: Protein structure prediction using coarse-grained physical  
750 potentials and bioinformatically based local structure biasing. *J Phys Chem B.*  
751 2012;116: 8494–8503. doi:10.1021/jp212541y

## 752 **Supporting Information**

753 **Supplementary Table 1. HLA I alleles for which homology models were**  
754 **generated.**

755 Clusters are also indicated with numbers (1, 2, or 3). HLA core alleles (taken from  
756 Robinson et al. [53]) are shown in bold.

757

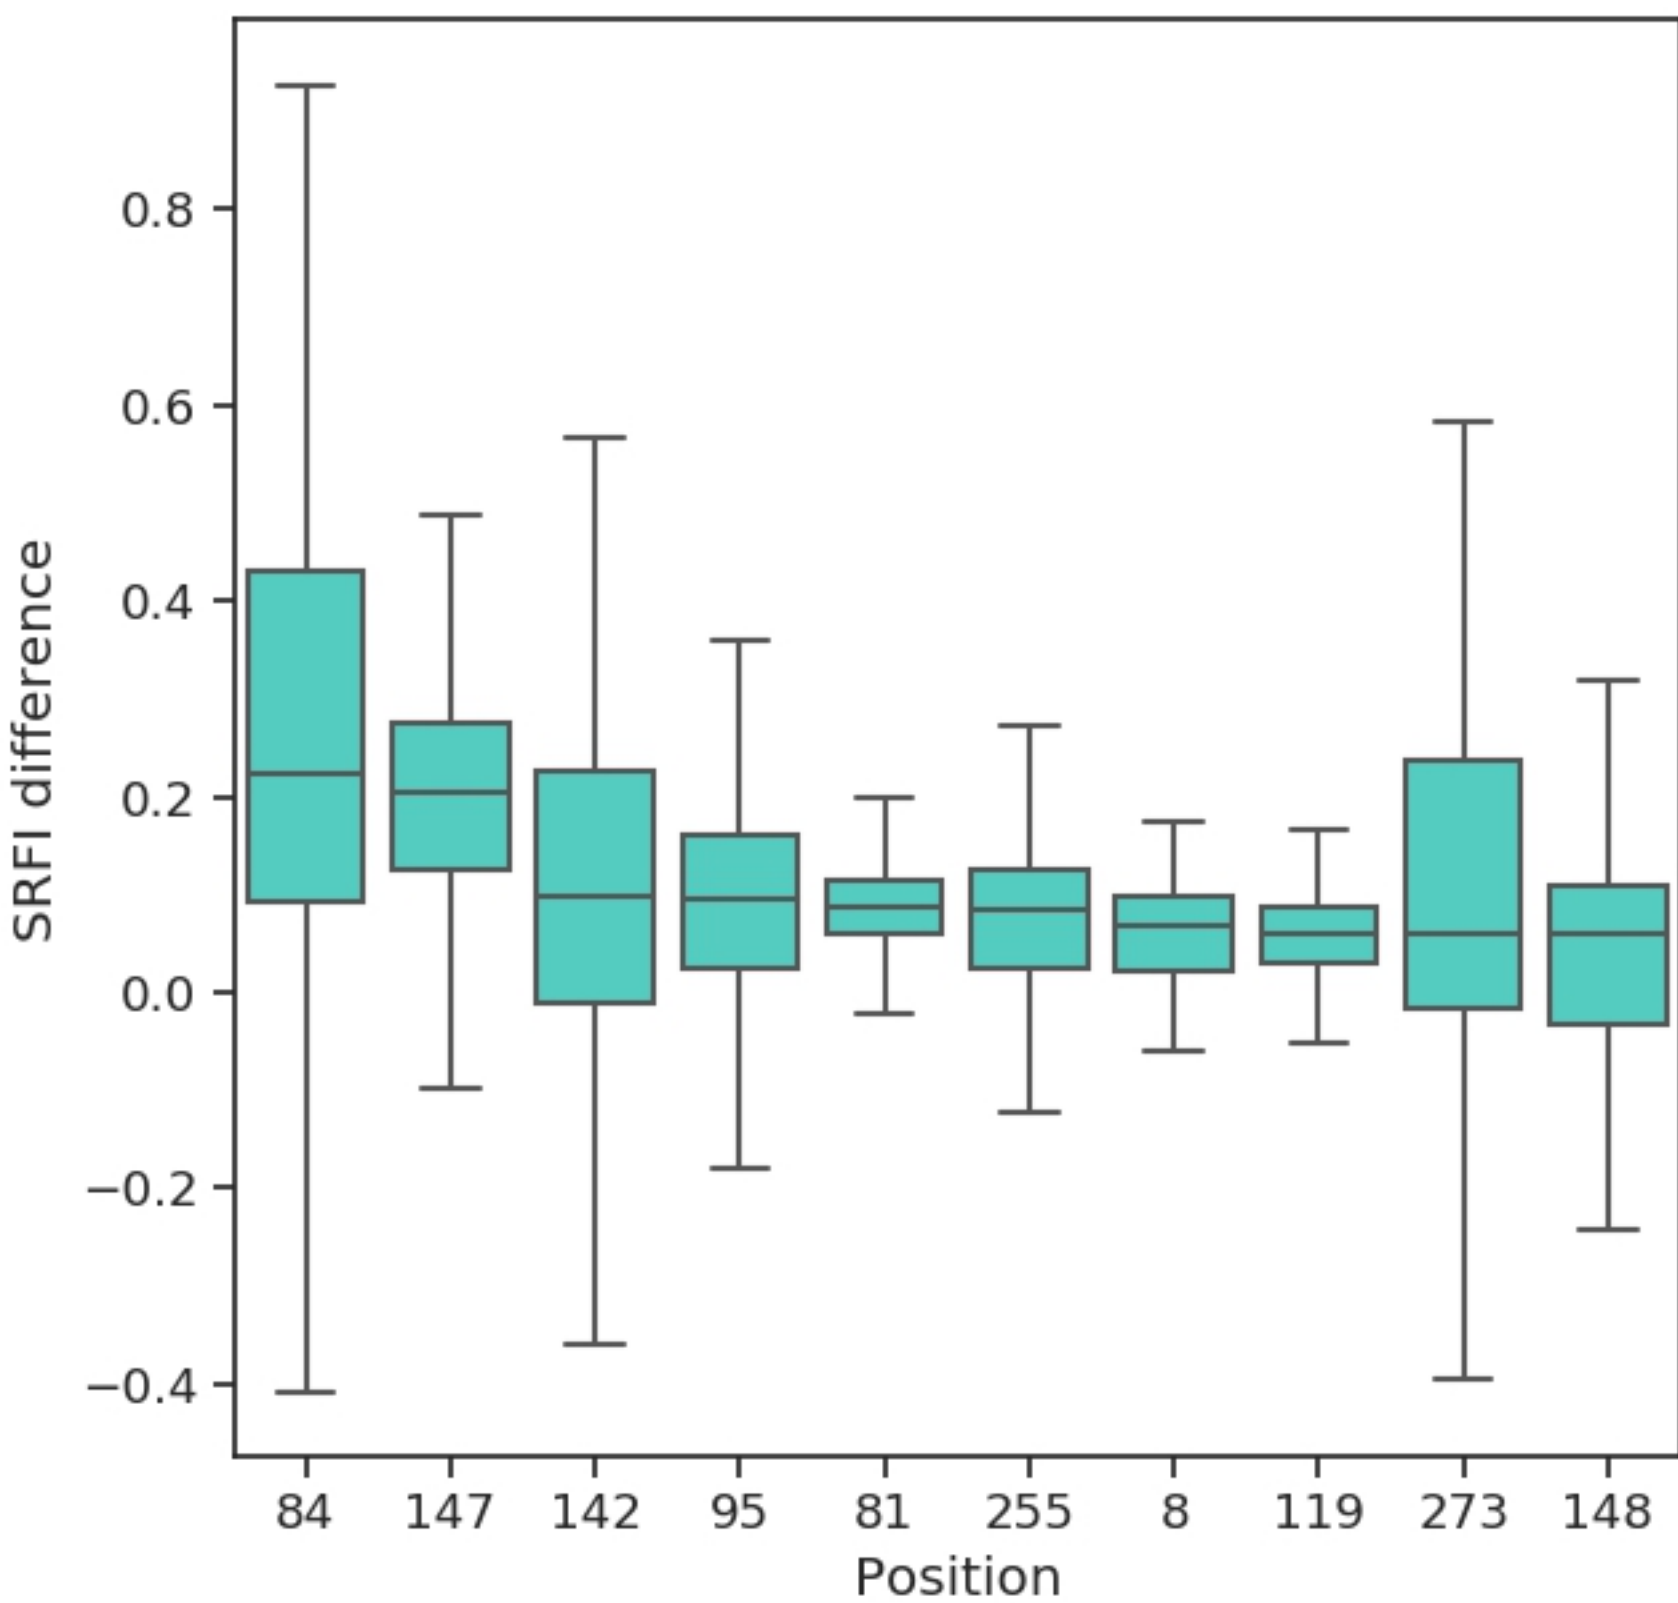

Figure 6

# peptide

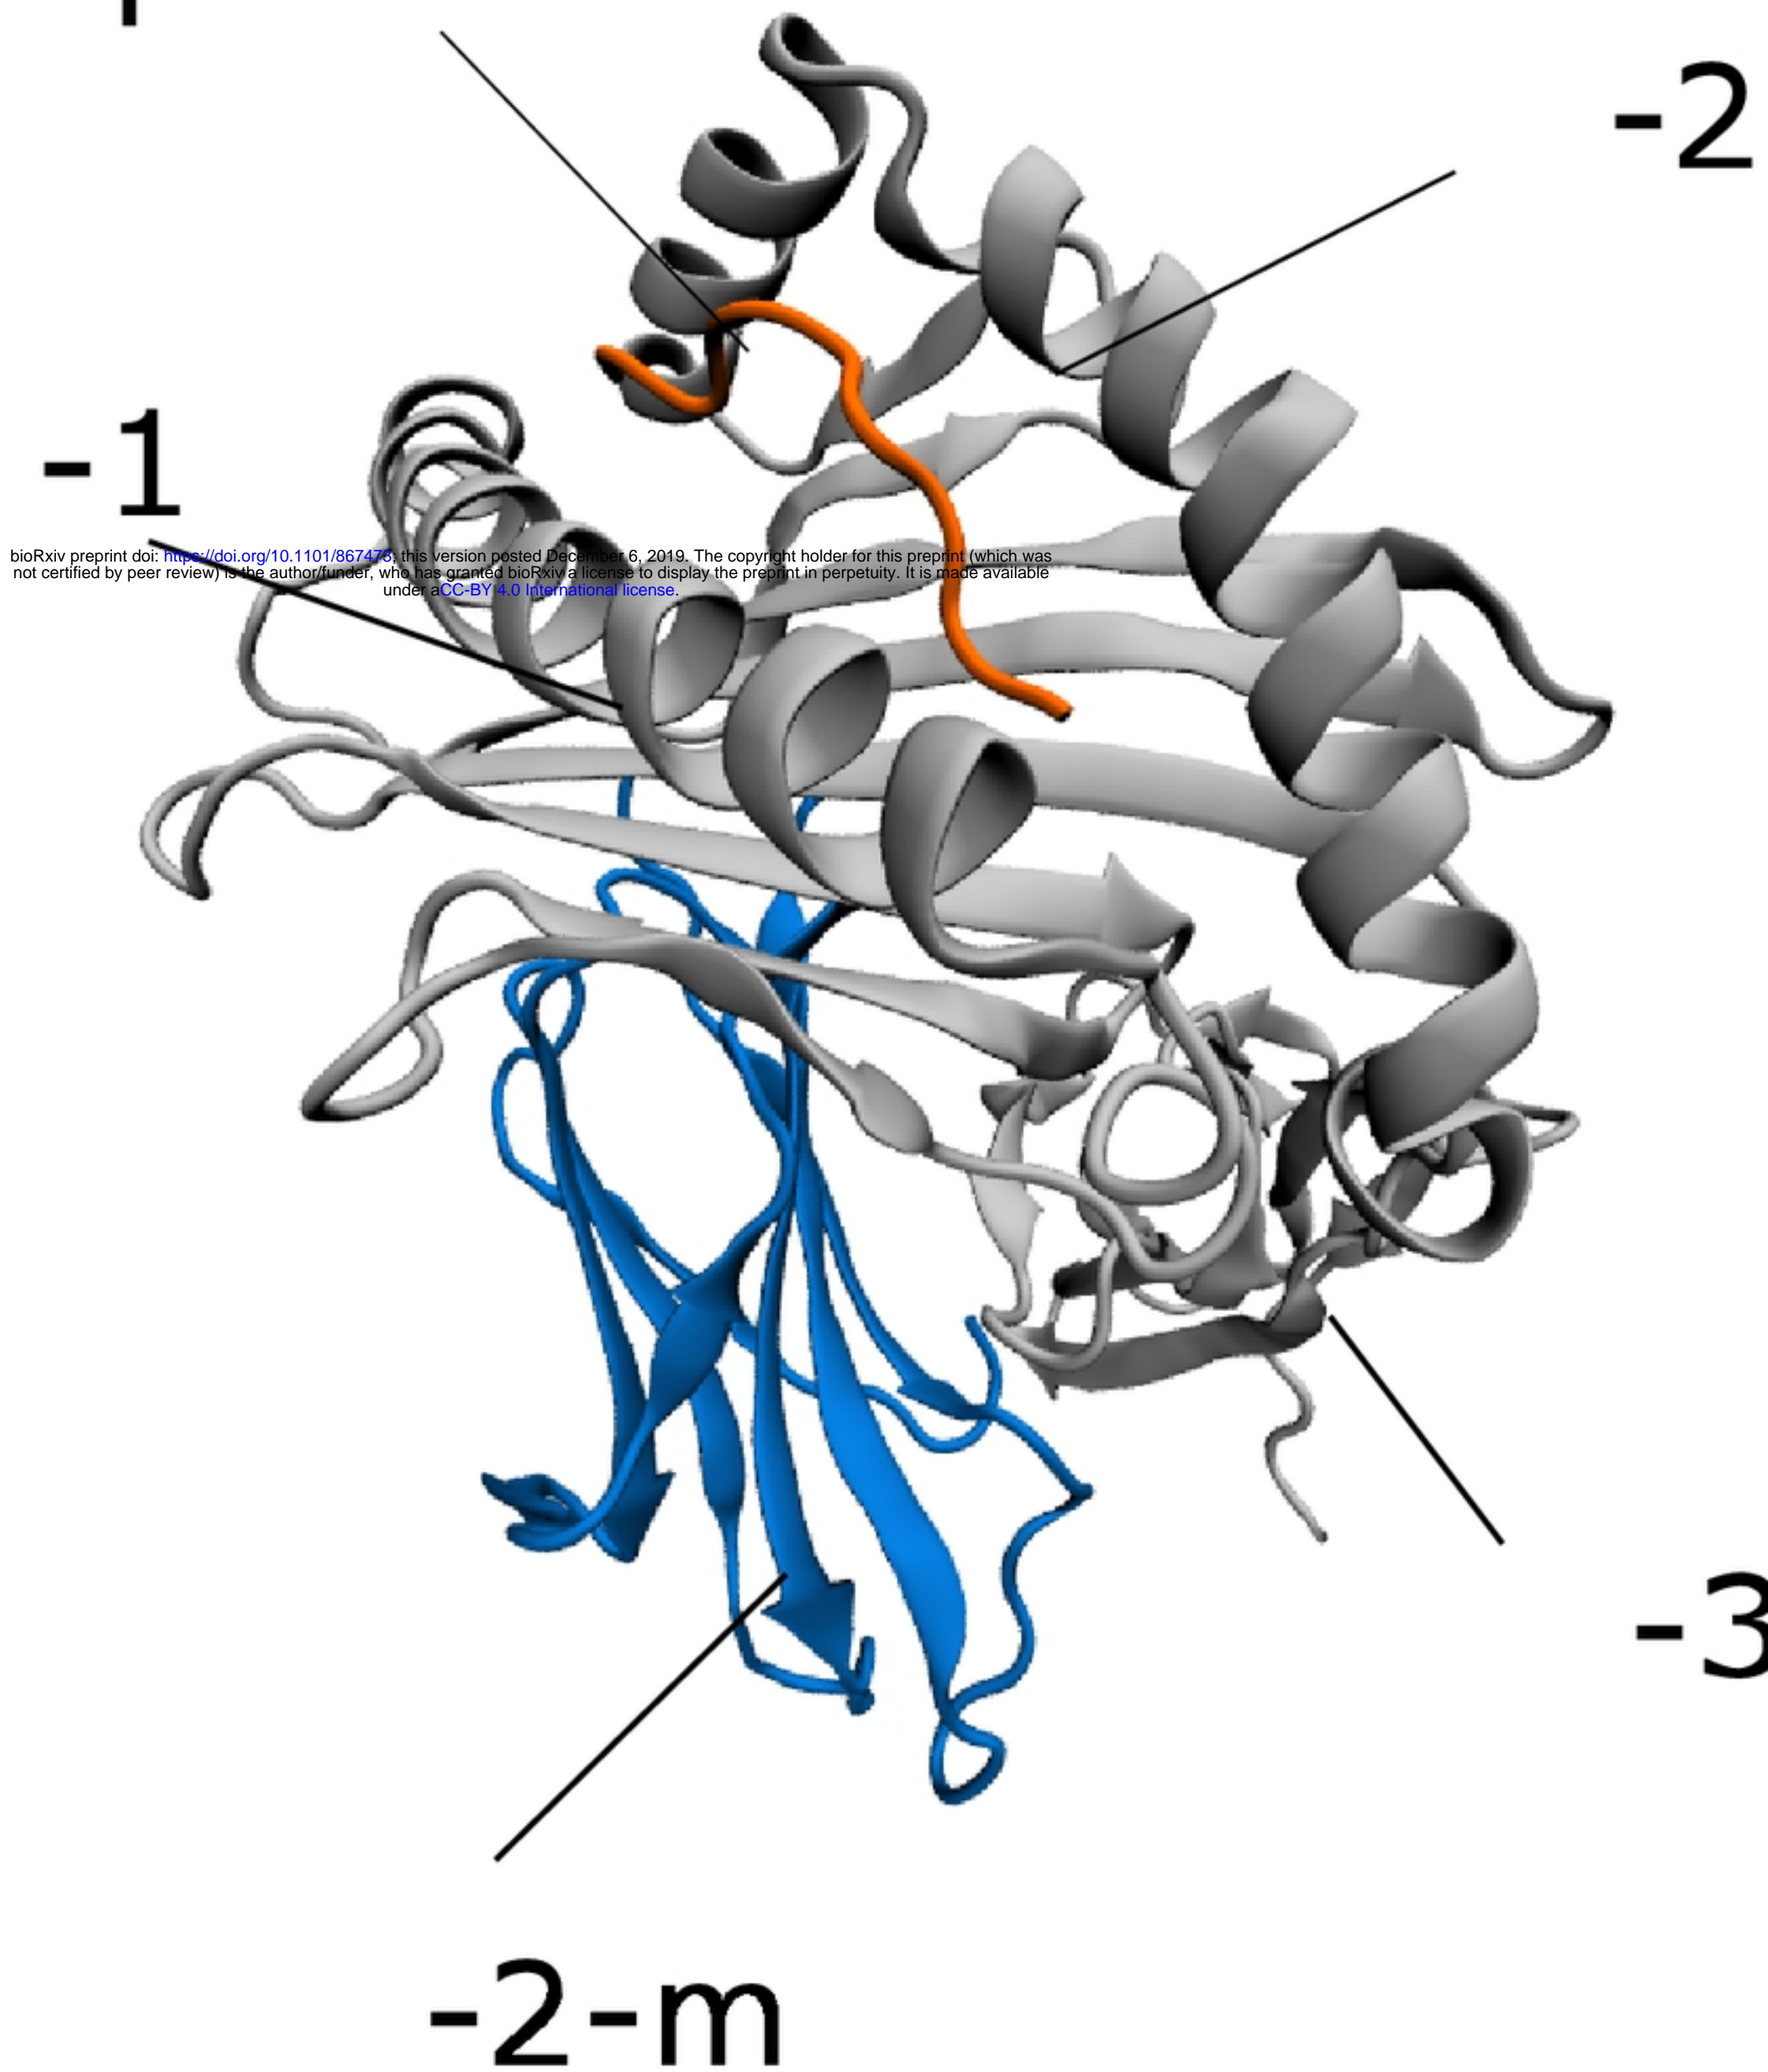

Figure 1

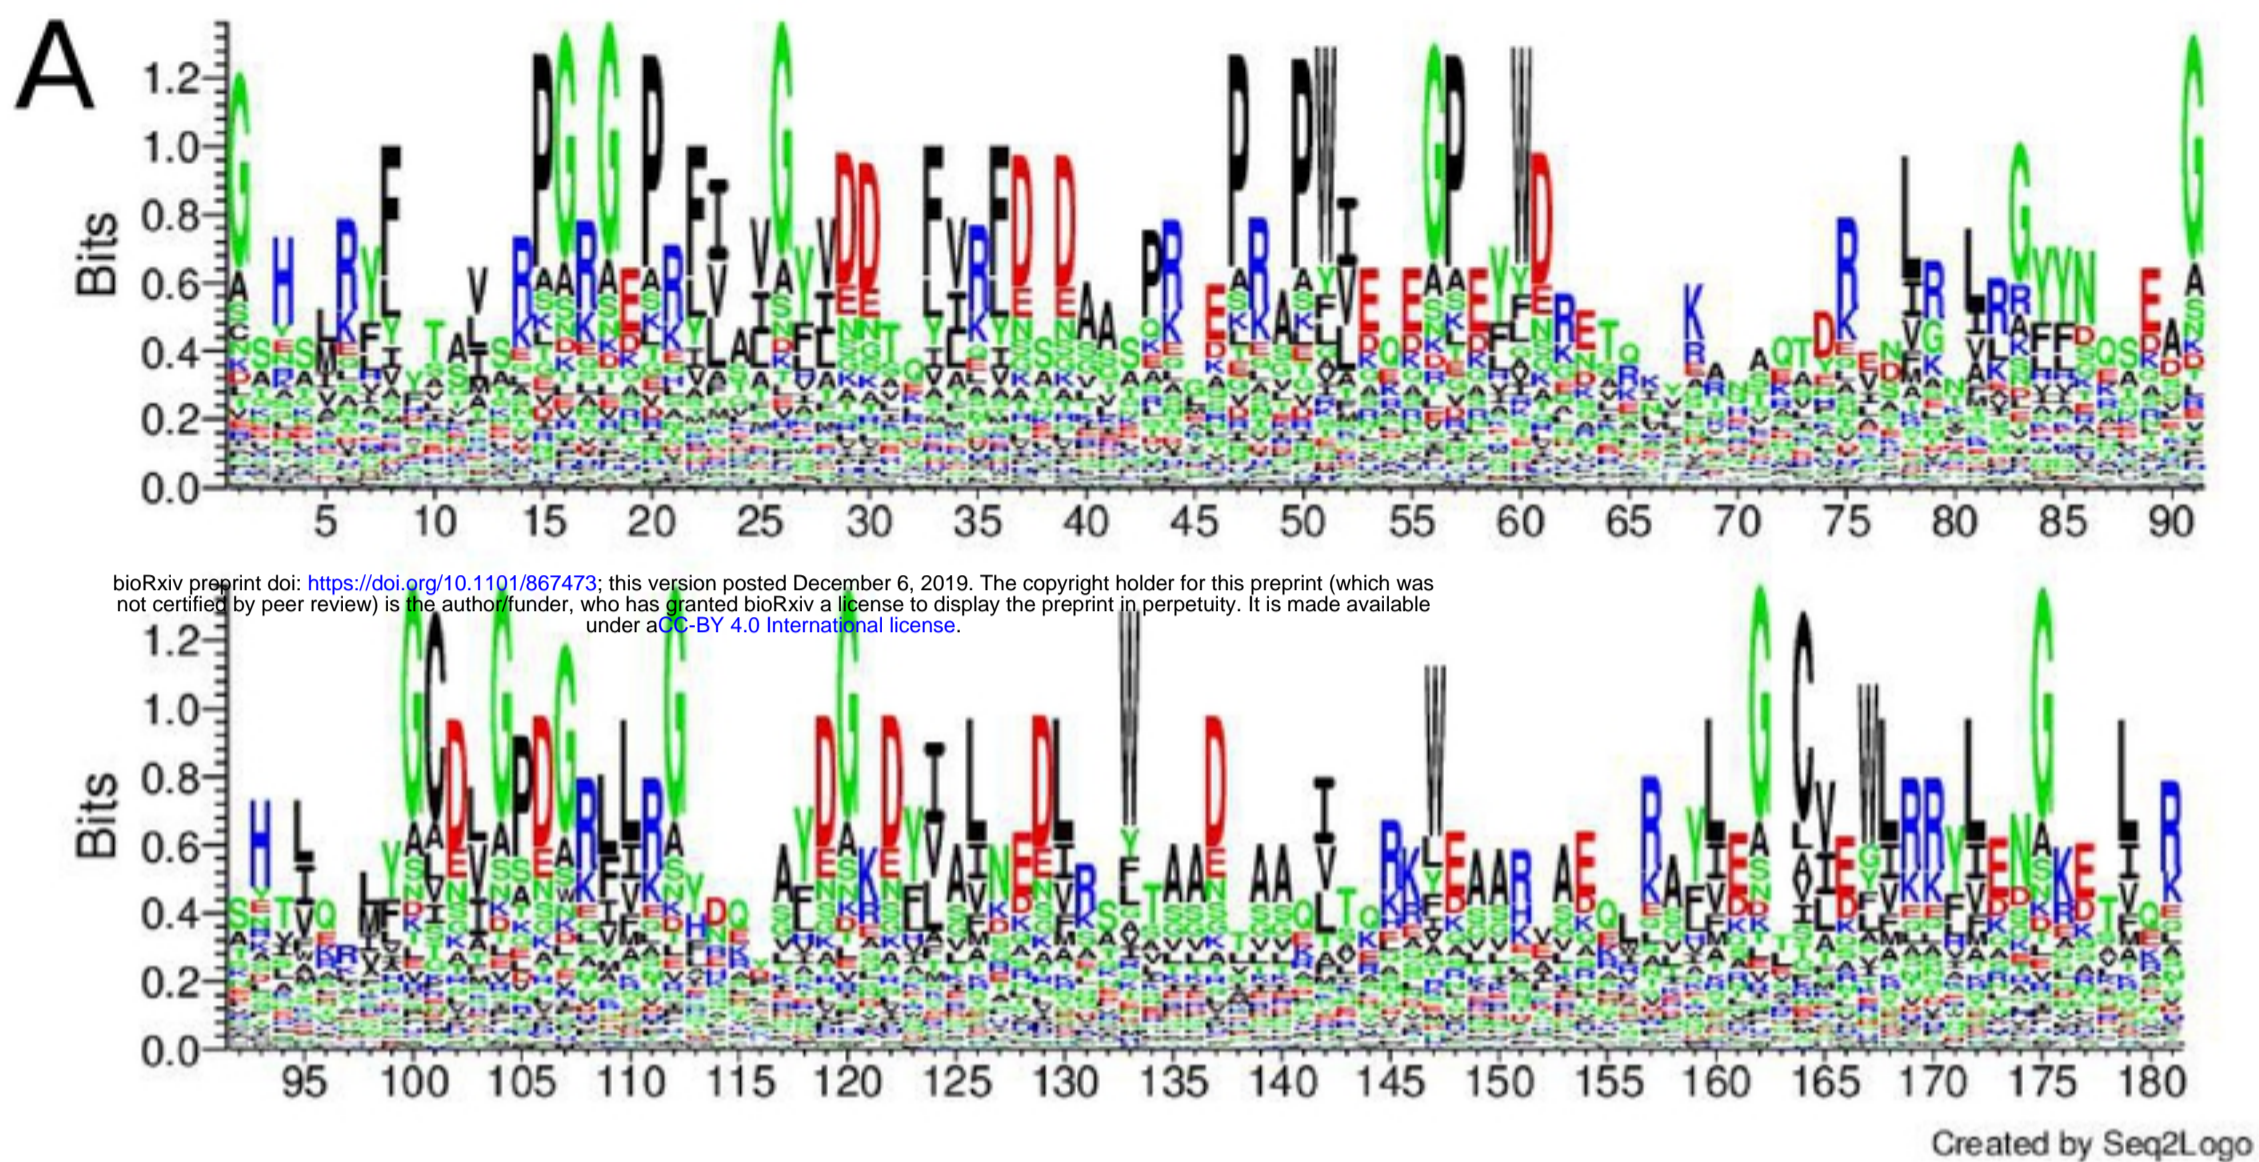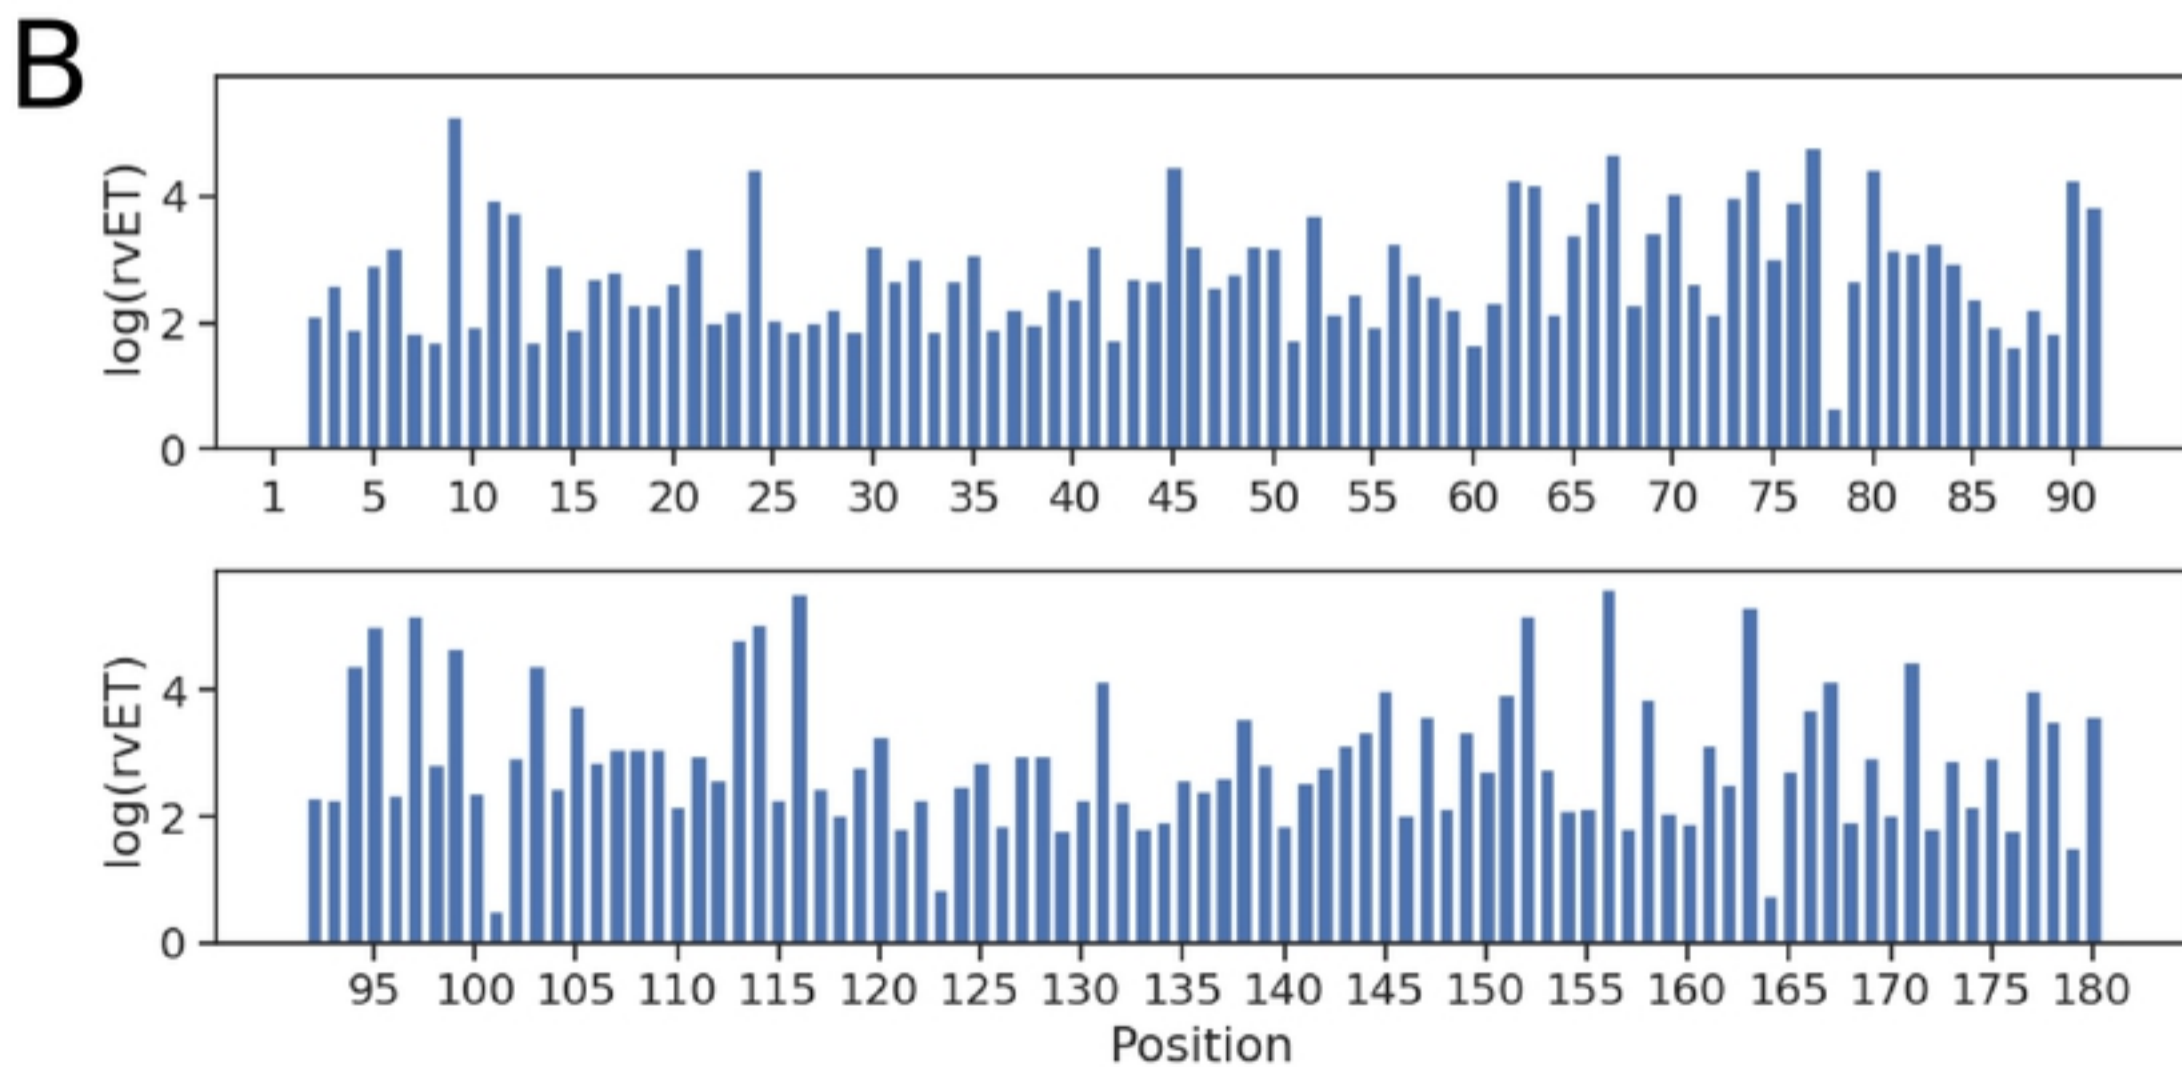

Figure 2

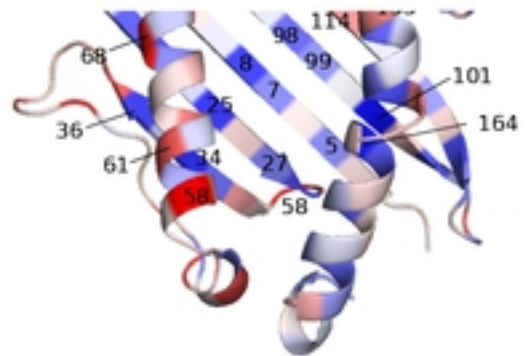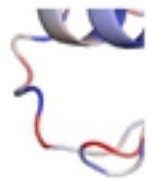

D

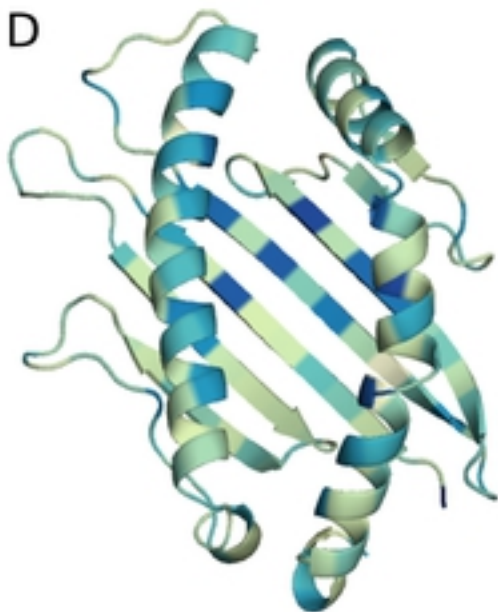

E

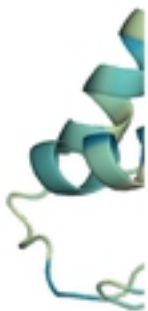

Figure 3



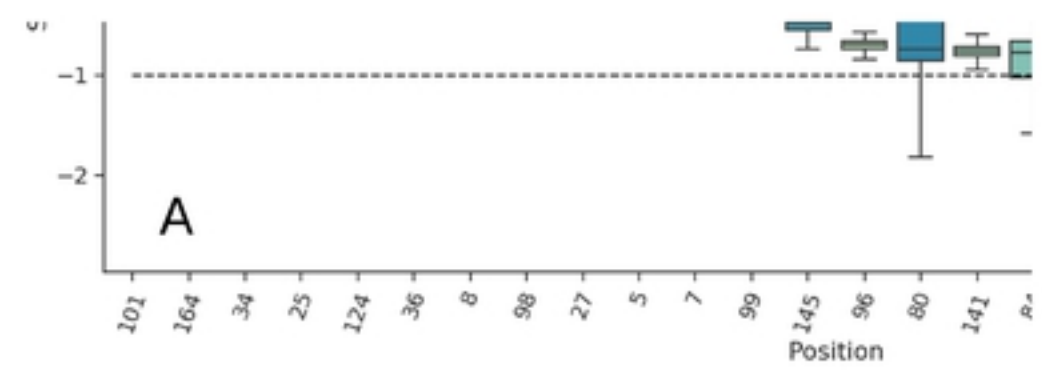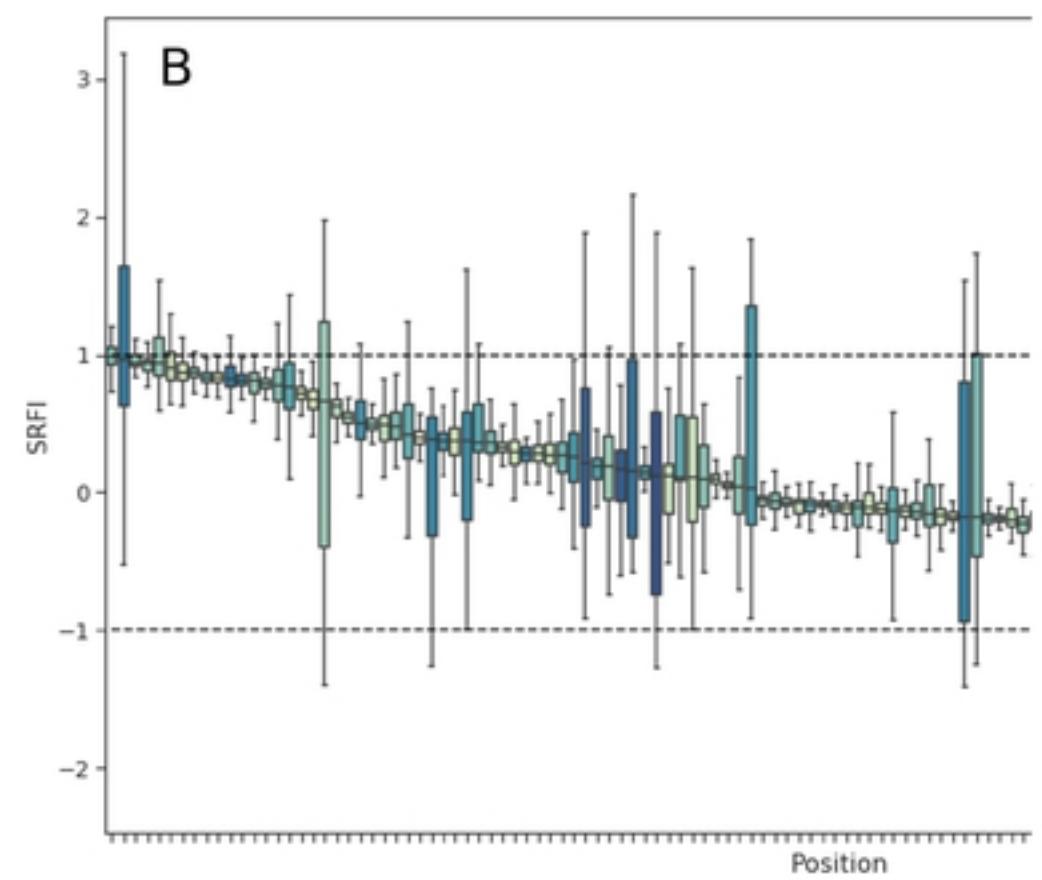

Figure 4

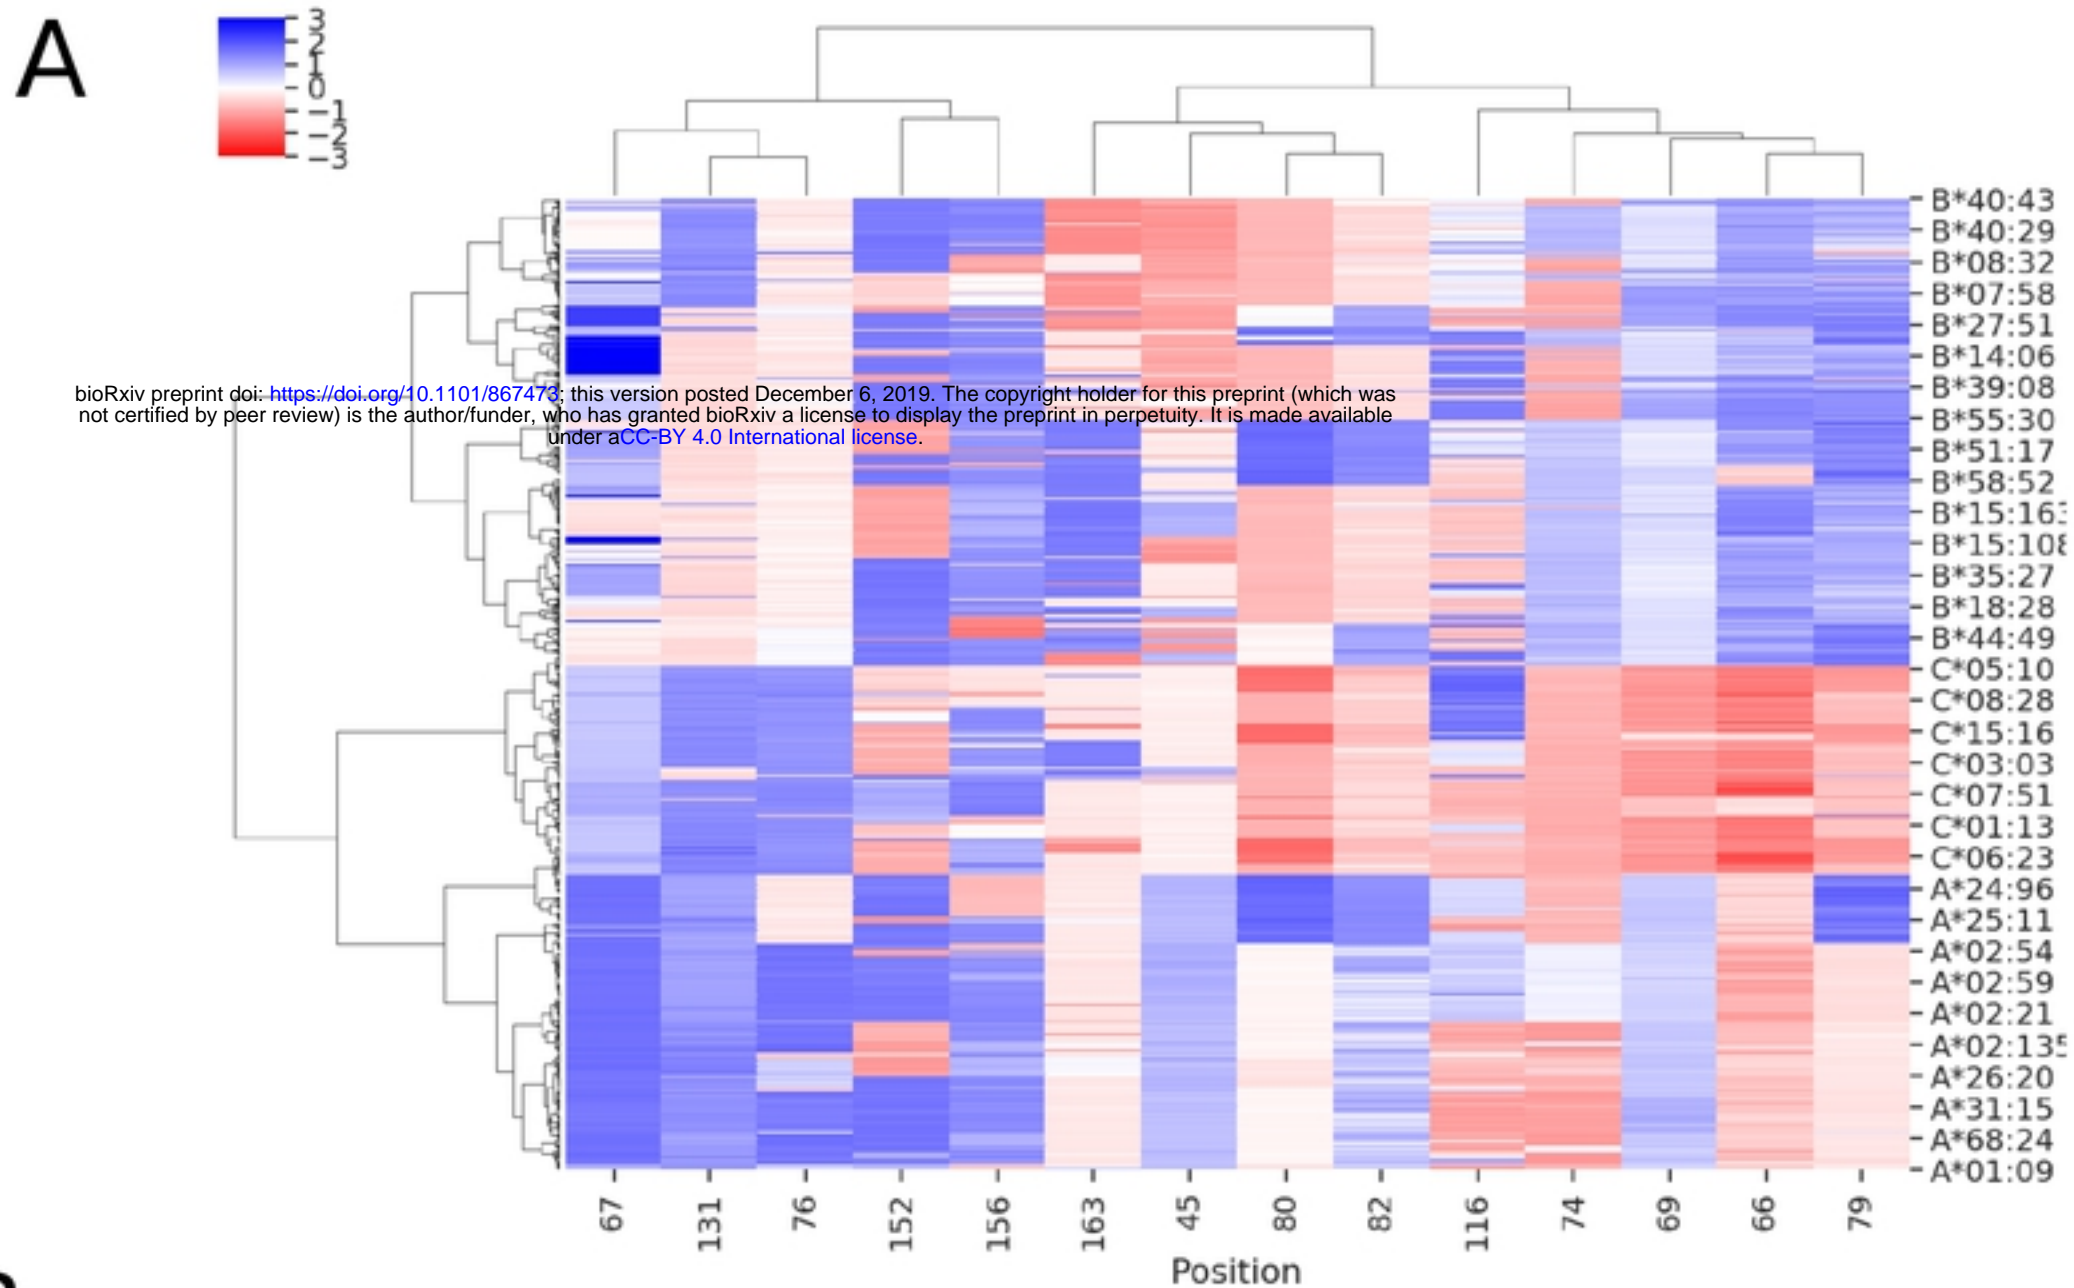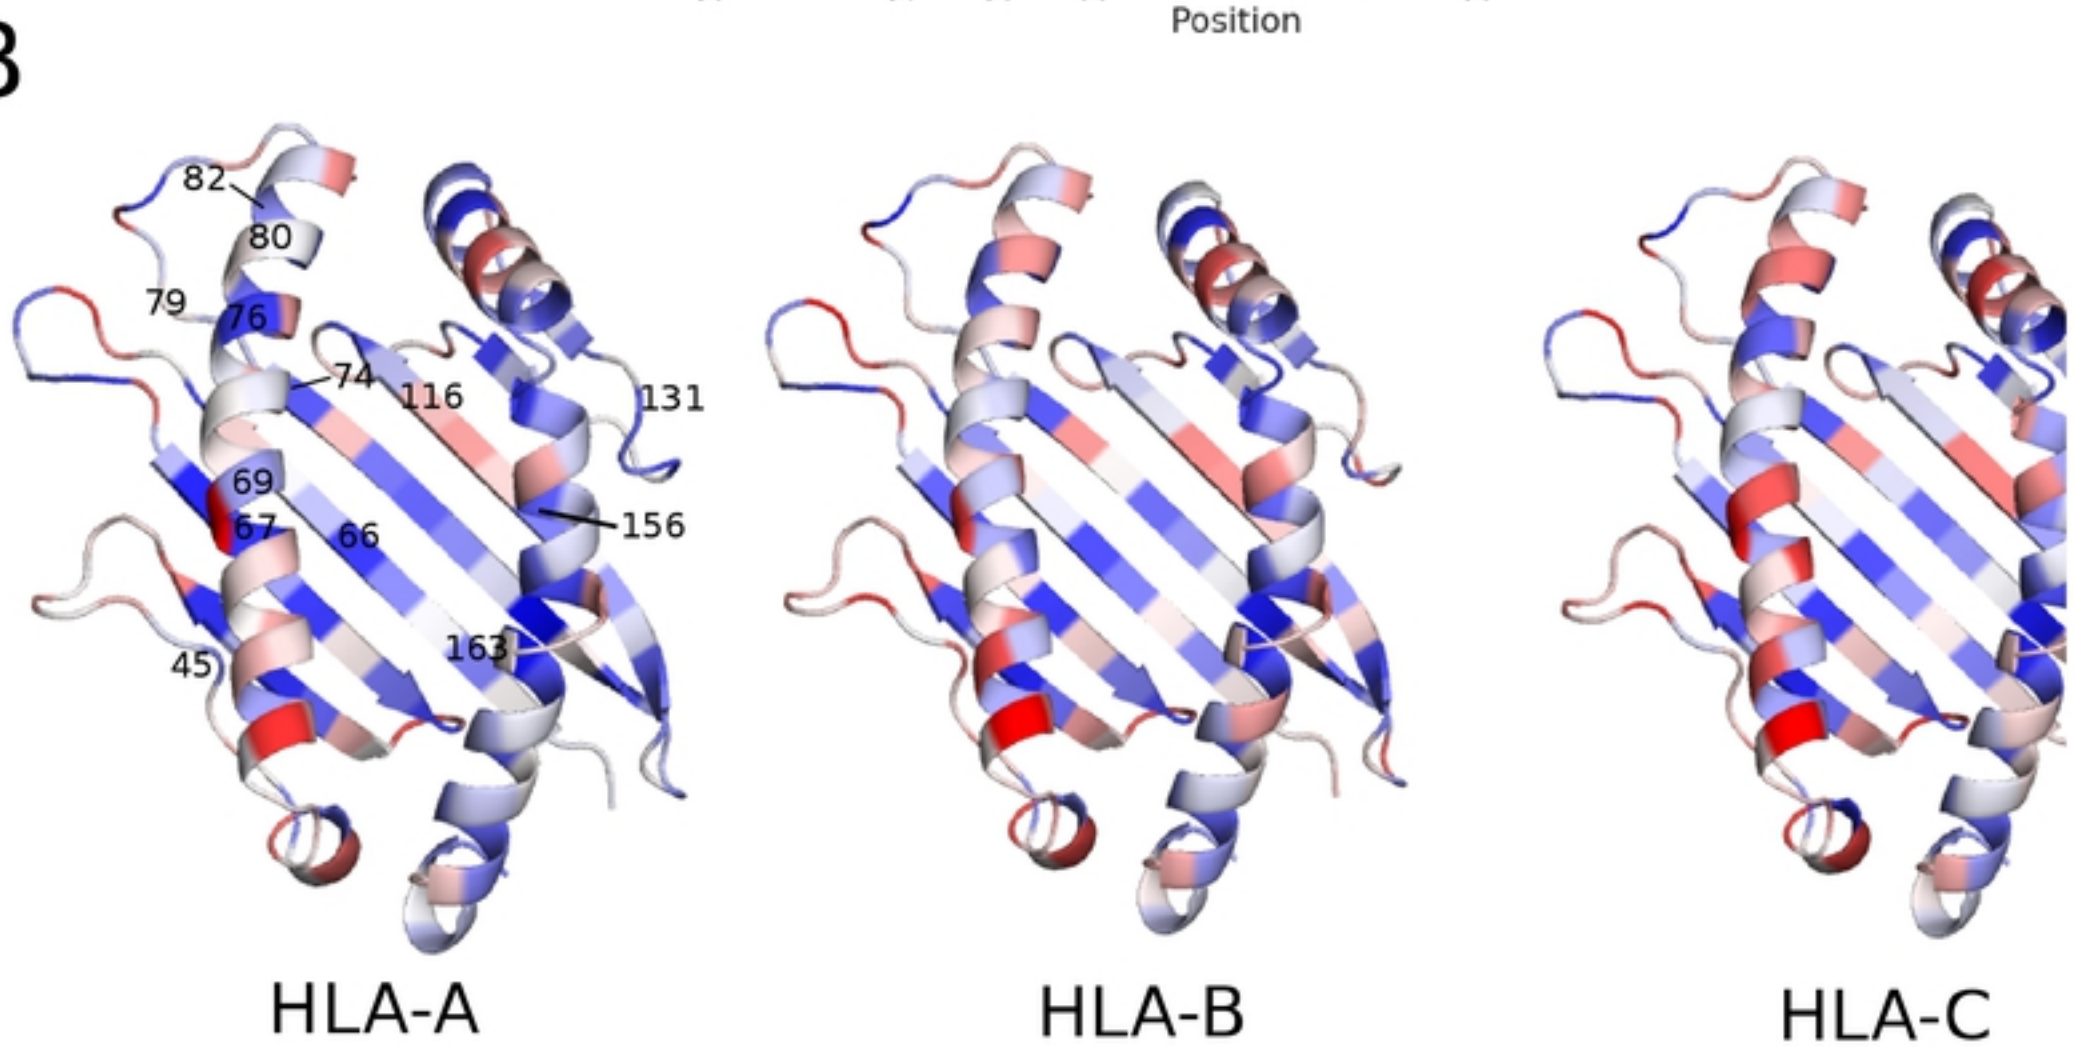

Figure 5
